# Supplementary material for: Effects of oxygen exposure on relative nucleic acid content and membrane integrity in the human gut microbiota
Source: PeerJ. 2021 Feb 3;9:e10602. doi: 10.7717/peerj.10602 (PMC7866891; doi:10.7717/peerj.10602)
Supplement: Supplemental Information 1 — Raw data for Flow cytometry cell counts for individuals A-G (Figs. 2A and 2B) obtained after acquisition on the Canto flow cytometer. Sample label, mean fluorescence and scatter, gated counts for cells and reference beads, volumes of beads and sample are all provided. Cell abundances are obtained using the gated counts on FlowJo, reference beads concentration, and sample volume. Proportions of HNA, LNA, and Pi cells are calculated relative to the total cell counts obtained by SybrGreen staining. Concentration of reference beads for each acquisition date are found in rows 199-203. Data used in Figures are in columns X (%HNA) and P (Pi+). [file peerj-09-10602-s001.xlsx]

## Sheet: Cellcounts
Raw data for Flow cytometry cell counts for individuals A-G (Fig 2A, B) obtained after acquisition on the Canto flow cytometer. Sample label, mean fluorescence and scatter, gated counts for cells and reference beads, volumes of beads and sample are all provided. Cell abundances are obtained using the gated counts on FlowJo, reference beads concentration, and sample volume. Proportions of HNA, LNA…
Sample label (date_timepoint_individual_storage condition_stain)	bacteria fitc | Mean (FITC-A)	beads | Mean (FITC-A)	beads | Count	HNA' | Count	LNA | Count	PI | Count	trucount | Count	bead vol (uL)	Sample volume (uL)	dilution	HNA/ul	HNA/ml	average	stdev	LNA/ul	LNA/ml	average	stdev	total cells	average	stdev	% HNA	average	stdev	%LNA	average	stdev	% total cells	bacteria/bead fl1	average	stdev			Total bacterial /gram		Total bacterial /ml
031019_T0-A_S_001.fcs	1834	7758	464	39737	17803			20	1500	50	4800.57	2.40028e+08	2.81223e+08	3.75018e+07	2150.75	1.07538e+08	1.00619e+08	6.59749e+06	3.47566e+08	3.81842e+08	3.29576e+07	0.690598	0.734476	0.0380435	0.309402	0.265524	0.0380435	1	0.236401	0.336781	0.0874265	A T0		3.81842e+09		3.81842e+08
031019_T0-A_S_002.fcs	3071	7750	435	48638	15508			20	1500	50	6267.61	3.13381e+08			1998.4	9.992e+07			4.13301e+08			0.758239			0.241761			1	0.396258							2.68273e+08
031019_T0-A_S_003.fcs	2989	7914	457	47328	15392			20	1500	50	5805.21	2.9026e+08			1887.97	9.43984e+07			3.84659e+08			0.754592			0.245408			1	0.377685							2.67948e+08
031019_T0-B_S_001.fcs	6870	7807	495	32207	12656			20	1500	50	3647.21	1.8236e+08	2.04149e+08	2.15083e+07	1433.2	7.166e+07	6.41244e+07	6.57814e+06	2.54021e+08	2.68273e+08	1.55735e+07	0.717897	0.759616	0.0376444	0.282103	0.240384	0.0376444	1	0.87998	1.13629	0.476672	B T0		2.68273e+09		1.99072e+08
031019_T0-B_S_002.fcs	6681	7929	493	36010	10762			20	1500	50	4094.42	2.04721e+08			1223.66	6.11831e+07			2.65904e+08			0.769905			0.230095			1	0.842603							1.51283e+08
031019_T0-B_S_003.fcs	13185	7819	492	39561	10450			20	1500	50	4507.31	2.25366e+08			1190.6	5.95301e+07			2.84896e+08			0.791046			0.208954			1	1.68628							3.57129e+08
031019_T6-A-C_S_001.fcs	7378	6778	431	29977	6516			20	1500	50	3898.76	1.94938e+08	2.27923e+08	3.11655e+07	847.461	4.2373e+07	4.0025e+07	2.04542e+06	2.37311e+08	2.67948e+08	2.92197e+07	0.821445	0.848853	0.0246682	0.178555	0.151147	0.0246682	1	1.08852	1.02828	0.164457	A AN		2.67948e+09		2.40364e+08
031019_T6-A-C_S_002.fcs	6020	7148	437	36166	6092			20	1500	50	4639.11	2.31956e+08			781.437	3.90719e+07			2.71027e+08			0.855838			0.144162			1	0.842194							3.32961e+08
031019_T6-A-C_S_003.fcs	8522	7384	479	43901	6602			20	1500	50	5137.53	2.56877e+08			772.602	3.86301e+07			2.95507e+08			0.869275			0.130725			1	1.15412							1.3119e+09
031019_T6-A-GP_S_001.fcs	6408	7177	468	25450	7424			20	1500	50	3048.3	1.52415e+08	1.51933e+08	2.44442e+07	889.217	4.44609e+07	4.71394e+07	2.43125e+06	1.96876e+08	1.99072e+08	2.52405e+07	0.774168	0.760981	0.0295415	0.225832	0.239019	0.0295415	1	0.892852	0.861365	0.0446144	A GP		1.99072e+09		1.16977e+09
031019_T6-A-GP_S_002.fcs	6274	7122	451	28342	7918			20	1500	50	3522.65	1.76133e+08			984.135	4.92067e+07			2.25339e+08			0.781633			0.218367			1	0.880932							9.57851e+08
031019_T6-A-GP_S_003.fcs	5690	7022	460	20885	7837			20	1500	50	2545.03	1.27251e+08			955.01	4.77505e+07			1.75002e+08			0.727143			0.272857			1	0.81031							8.8031e+08
031019_T6-A-O2_S_001.fcs	5836	7268	465	19042	5016			20	1500	50	2295.49	1.14774e+08	1.20247e+08	1.60992e+07	604.673	3.02336e+07	3.10353e+07	913459	1.45008e+08	1.51283e+08	1.6878e+07	0.791504	0.793583	0.0175012	0.208496	0.206417	0.0175012	1	0.802972	0.886416	0.128317	A AE		1.51283e+09		1.10194e+09
031019_T6-A-O2_S_002.fcs	5772	7021	458	22611	5234			20	1500	50	2767.39	1.38369e+08			640.596	3.20298e+07			1.70399e+08			0.812031			0.187969			1	0.822105							4.45787e+08
031019_T6-A-O2_S_003.fcs	7324	7082	459	17621	5051			20	1500	50	2151.96	1.07598e+08			616.851	3.08426e+07			1.3844e+08			0.777214			0.222786			1	1.03417							1.15931e+09
031019_T6-B-C_S_001.fcs	7061	7232	487	48174	7915			20	1500	50	5544.97	2.77249e+08	3.09582e+08	2.80375e+07	911.04	4.5552e+07	4.75475e+07	1.84898e+06	3.22801e+08	3.57129e+08	2.97393e+07	0.858885	0.866493	0.00689249	0.141115	0.133507	0.00689249	1	0.976355	0.891491	0.0908824	B AN		3.57129e+09		4.10816e+08
031019_T6-B-C_S_002.fcs	6407	7099	481	55659	8444			20	1500	50	6486.43	3.24322e+08			984.054	4.92027e+07			3.73524e+08			0.868274			0.131726			1	0.902521							3.66105e+08
031019_T6-B-C_S_003.fcs	5457	6859	442	51596	7552			20	1500	50	6543.49	3.27175e+08			957.757	4.78879e+07			3.75062e+08			0.87232			0.12768			1	0.795597							9.27038e+08
031019_T6-B-GP_S_001.fcs	6272	7221	484	30559	9206			20	1500	50	3539.24	1.76962e+08	1.86027e+08	1.22138e+07	1066.21	5.33103e+07	5.43363e+07	1.21979e+06	2.30272e+08	2.40364e+08	1.22057e+07	0.76849	0.77357	0.0120134	0.23151	0.22643	0.0120134	1	0.868578	0.91552	0.110301	B GP		2.40364e+09		1.23237e+09
031019_T6-B-GP_S_002.fcs	7424	7128	475	33881	9154			20	1500	50	3998.33	1.99916e+08			1080.27	5.40136e+07			2.5393e+08			0.787289			0.212711			1	1.04153							1.38291e+09
031019_T6-B-GP_S_003.fcs	5984	7154	477	30839	9477			20	1500	50	3624.08	1.81204e+08			1113.7	5.5685e+07			2.36889e+08			0.764932			0.235068			1	0.836455							6.34346e+08
031019_T6-B-O2_S_001.fcs	8481	7284	489	41197	5597			20	1500	50	4722.5	2.36125e+08	2.86302e+08	4.34544e+07	641.597	3.20798e+07	4.66594e+07	1.28801e+07	2.68205e+08	3.32961e+08	5.61386e+07	0.880391	0.861712	0.0172303	0.119609	0.138288	0.0172303	1	1.16433	1.72433	0.898529	B AE		3.32961e+09		3.97766e+08
031019_T6-B-O2_S_002.fcs	8980	7196	490	54439	8987			20	1500	50	6227.73	3.11386e+08			1028.1	5.14049e+07			3.62791e+08			0.858307			0.141693			1	1.24792							6.38408e+08
031019_T6-B-O2_S_003.fcs	18704	6775	486	53996	9796			20	1500	50	6227.89	3.11395e+08			1129.87	5.64935e+07			3.67888e+08			0.846438			0.153562			1	2.76074							9.12276e+08
B T0 S_Tube_001_001.fcs	11646	1758	488	29282	35401			15	500	75	8902.12	6.67659e+08	6.2922e+08	5.43605e+07	10762.4	8.07178e+08	7.58289e+08	6.9139e+07	1.47484e+09	1.38751e+09	1.23499e+08	0.4527	0.453542	0.0011904	0.5473	0.546458	0.0011904	1	6.62457	7.1964	0.808686			1.38751e+10		7.63593e+08
B T0 S_Tube_002_002.fcs	13105	1687	495	26282	31559			15	500	75	7877.08	5.90781e+08			9458.68	7.09401e+08			1.30018e+09			0.454384			0.545616			1	7.76823							6.50741e+08
B T0 S_Tube_003_003.fcs	14114	1618	394	21377	24380			15	500	75	8049.39	6.03704e+08			9180.15	6.88511e+08			1.29222e+09			0.467185			0.532815			1	8.72311							1.07173e+09
B T6 A S_Tube_001_020.fcs	11557	1770	456	13352	20960			15	500	100	3382.61	3.38261e+08	3.83826e+08	5.89056e+07	5310.03	5.31003e+08	5.74025e+08	4.51605e+07	8.69264e+08	9.57851e+08	7.88509e+07	0.389135	0.399764	0.0374287	0.610865	0.600236	0.0374287	1	6.52938	6.94742	0.701044			9.57851e+09		1.41982e+09
B T6 A S_Tube_002_021.fcs	11624	1773	467	14669	25106			15	500	100	3628.73	3.62873e+08			6210.57	6.21057e+08			9.8393e+08			0.368799			0.631201			1	6.55612							6.03229e+08
B T6 A S_Tube_003_022.fcs	13458	1735	465	18127	22944			15	500	100	4503.43	4.50343e+08			5700.16	5.70016e+08			1.02036e+09			0.441358			0.558642			1	7.75677							1.6162e+09
B T6 CH S_Tube_001_014.fcs	10644	1833	487	24796	19529			15	500	100	5881.98	5.88198e+08	5.02758e+08	7.67974e+07	4632.57	4.63257e+08	3.77552e+08	7.44714e+07	1.05145e+09	8.8031e+08	1.48921e+08	0.559413	0.572188	0.0189077	0.440587	0.427812	0.0189077	1	5.80687	6.55161	0.64712			8.8031e+09
B T6 CH S_Tube_002_015.fcs	12643	1840	477	18146	14071			15	500	100	4394.74	4.39474e+08			3407.82	3.40782e+08			7.80257e+08			0.563243			0.436757			1	6.8712
B T6 CH S_Tube_003_016.fcs	12614	1808	480	19969	13654			15	500	100	4806.02	4.80602e+08			3286.16	3.28616e+08			8.09219e+08			0.593909			0.406091			1	6.97677
B T6 GP S_Tube_001_017.fcs	12745	1659	475	26459	23645			15	500	100	6435.03	6.43503e+08	6.02381e+08	4.34359e+07	5750.64	5.75064e+08	4.99557e+08	8.4914e+07	1.21857e+09	1.10194e+09	1.28253e+08	0.528082	0.548628	0.0256679	0.471918	0.451372	0.0256679	1	7.68234	7.09926	0.579891			1.10194e+10
B T6 GP S_Tube_002_018.fcs	11395	1747	469	22611	16549			15	500	100	5569.52	5.56952e+08			4076.33	4.07633e+08			9.64585e+08			0.5774			0.4226			1	6.52261
B T6 GP S_Tube_003_019.fcs	12072	1702	461	24210	20590			15	500	100	6066.87	6.06687e+08			5159.72	5.15972e+08			1.12266e+09			0.540402			0.459598			1	7.09283
C T6 A S_Tube_001_029.fcs	9595	2132	447	7513	16921			10	500	100	1294.45	1.29445e+08	1.48325e+08	1.68019e+07	2915.4	2.9154e+08	2.97462e+08	3.64702e+07	4.20985e+08	4.45787e+08	4.53805e+07	0.307481	0.333309	0.03121	0.692519	0.666691	0.03121	1	4.50047	4.61149	0.335735			4.45787e+09
C T6 A S_Tube_002_030.fcs	9299	2140	461	9675	20144			10	500	100	1616.33	1.61633e+08			3365.3	3.3653e+08			4.98163e+08			0.324458			0.675542			1	4.34533
C T6 A S_Tube_003_031.fcs	10571	2119	460	9192	15787			10	500	100	1538.98	1.53898e+08			2643.15	2.64315e+08			4.18212e+08			0.367989			0.632011			1	4.98867
C T0 S_Tube_001_005.fcs	7231	2150	485	13114	25163			20	500	75	5348.65	4.01149e+08	4.24676e+08	2.04145e+07	10262.9	7.6972e+08	7.34631e+08	5.31849e+07	1.17087e+09	1.15931e+09	4.35495e+07	0.342608	0.366806	0.0257822	0.657392	0.633194	0.0257822	1	3.36326	4.47492	1.04945			1.15931e+10
C T0 S_Tube_002_006.fcs	10788	1980	461	13601	20926			20	500	75	5836.08	4.37706e+08			8979.17	6.73438e+08			1.11114e+09			0.393924			0.606076			1	5.44848
C T0 S_Tube_003_007.fcs	9286	2013	466	13669	23895			20	500	75	5802.32	4.35174e+08			10143.1	7.60735e+08			1.19591e+09			0.363886			0.636114			1	4.61302
C T6 CH S_Tube_001_023.fcs	8421	2111	459	4848	11544			15	500	100	1220.17	1.22017e+08	1.33679e+08	1.43042e+07	2905.46	2.90546e+08	2.77137e+08	1.47443e+07	4.12563e+08	4.10816e+08	1.92743e+07	0.295754	0.325189	0.0269597	0.704246	0.674811	0.0269597	1	3.9891	4.37859	0.337434			4.10816e+09
C T6 CH S_Tube_002_024.fcs	9466	2074	456	5107	10316			15	500	100	1293.81	1.29381e+08			2613.47	2.61347e+08			3.90728e+08			0.331129			0.668871			1	4.56413
C T6 CH S_Tube_003_025.fcs	9770	2132	470	6088	11372			15	500	100	1496.4	1.4964e+08			2795.18	2.79518e+08			4.29158e+08			0.348683			0.651317			1	4.58255
C T6 GP S_Tube_001_026.fcs	9295	2133	460	7680	15975			10	500	100	1285.83	1.28583e+08	1.18198e+08	1.23606e+07	2674.62	2.67462e+08	2.47907e+08	3.20885e+07	3.96045e+08	3.66105e+08	4.41509e+07	0.324667	0.323365	0.00876688	0.675333	0.676635	0.00876688	1	4.35771	4.39225	0.0316261			3.66105e+09
C T6 GP S_Tube_002_027.fcs	9300	2114	465	6311	12732			10	500	100	1045.26	1.04526e+08			2108.74	2.10874e+08			3.154e+08			0.331408			0.668592			1	4.39924
C T6 GP S_Tube_003_028.fcs	9423	2132	447	7051	15403			10	500	100	1214.85	1.21485e+08			2653.86	2.65386e+08			3.86871e+08			0.31402			0.68598			1	4.41979
T0 D S_Tube_001.fcs	21225	6909	496	13791	8521			15	500	100	5957.71	595771200	5.86702e+08	1.1165e+07	3681.07	368107200	3.40337e+08	2.51352e+07	963878400	9.27038e+08	3.19109e+07	0.618098	0.633173	0.0154648	0.381902	0.366827	0.0154648	1	3.07208	2.97433	0.155021			9.27038e+09
T0 D S_Tube_002.fcs	20987	6869	498	13346	7757			15	500	100	5742.32	5.74232e+08			3337.57	3.33757e+08			9.07988e+08			0.632422			0.367578			1	3.05532
T0 D S_Tube_003.fcs	19393	6937	502	13825	7477			15	500	100	5901.02	5.90102e+08			3191.46	3.19146e+08			9.09247e+08			0.649			0.351			1	2.79559
T0 E S_Tube_001.fcs	31211	6790	479	20809	7137			15	500	100	9308.53	9.30853e+08	9.28018e+08	8.01077e+07	3192.61	3.19261e+08	3.04349e+08	3.08035e+07	1.25011e+09	1.23237e+09	1.09124e+08	0.744615	0.753183	0.00755922	0.255385	0.246817	0.00755922	1	4.59661	4.70097	0.0930383			1.23237e+10
T0 E S_Tube_002.fcs	31277	6611	472	22175	7156			15	500	100	10066.7	1.00667e+09			3248.58	3.24858e+08			1.33153e+09			0.756026			0.243974			1	4.73105
T0 E S_Tube_003.fcs	32677	6843	483	19082	6062			15	500	100	8465.3	8.4653e+08			2689.27	2.68927e+08			1.11546e+09			0.758909			0.241091			1	4.77524
T0 F S_Tube_001.fcs	23368	7291	505	20178	11175			15	500	100	8561.55	8.56155e+08	9.2985e+08	8.42385e+07	4741.56	4.74156e+08	4.53063e+08	1.93187e+07	1.33031e+09	1.38291e+09	6.66813e+07	0.643575	0.671494	0.0286289	0.356425	0.328506	0.0286289	1	3.20505	3.44838	0.290239			1.38291e+10
T0 F S_Tube_002.fcs	24291	7207	495	21062	10368			15	500	100	9117.17	9.11717e+08			4488.02	4.48802e+08			1.36052e+09			0.670124			0.329876			1	3.37047
T0 F S_Tube_003.fcs	26557	7045	499	23793	10159			15	500	100	10216.8	1.02168e+09			4362.3	4.3623e+08			1.45791e+09			0.700783			0.299217			1	3.76962														average					LNA
T6 D S_C_001.fcs	5329	7305	497	32930	19160			15	1000	100	4016.82	4.01682e+08	4.14312e+08	1.84664e+07	2337.15	2.33715e+08	2.20033e+08	1.41081e+07	6.35397e+08	6.34346e+08	7.27691e+06	0.632175	0.65303	0.0240735	0.367825	0.34697	0.0240735	1	0.7295	0.75627	0.0289475			6.34346e+09									73.3333	69	76	75	31	24	25
T6 D S_C_002.fcs	5434	7223	489	32728	17814			15	1000	100	4057.49	4.05749e+08			2208.51	2.20851e+08			6.266e+08			0.647541			0.352459			1	0.752319														76	72	77	79	28	23	21
T6 D S_C_003.fcs	5686	7225	484	34769	16409			15	1000	100	4355.06	4.35506e+08			2055.34	2.05534e+08			6.4104e+08			0.679374			0.320626			1	0.78699														45.6667	45	45	47	55	55	53
T6 D S_GP_001.fcs	4827	7343	499	19566	9968			15	1000	100	2377.11	2.37711e+08	2.70214e+08	3.60332e+07	1211.03	1.21103e+08	1.27552e+08	1.30628e+07	3.58814e+08	3.97766e+08	4.81117e+07	0.662491	0.678683	0.014253	0.337509	0.321317	0.014253	1	0.657361	0.638619	0.0712596			3.97766e+09									36.3333	34	39	36	66	61	64
T6 D S_GP_002.fcs	4031	7200	489	24921	11501			15	1000	100	3089.61	3.08961e+08			1425.85	1.42585e+08			4.51546e+08			0.684229			0.315771			1	0.559861														63.3333	62	63	65	38	37	35
T6 D S_GP_003.fcs	5012	7174	489	21292	9596			15	1000	100	2639.7	2.6397e+08			1189.68	1.18968e+08			3.82938e+08			0.689329			0.310671			1	0.698634														75.3333	74	76	76	26	24	24
T6 D S_O2_001.fcs	5638	7118	488	35072	16117			15	1000	100	4357	4.357e+08	4.45188e+08	4.02458e+07	2002.22	2.00222e+08	1.9322e+08	2.25026e+07	6.35922e+08	6.38408e+08	6.11062e+07	0.685147	0.697675	0.012215	0.314853	0.302325	0.012215	1	0.792076	0.745229	0.0783213			6.38408e+09									67	64	67	70	36	33	30
T6 D S_O2_002.fcs	5789	7339	503	34062	13943			15	1000	100	4105.34	4.10534e+08			1680.49	1.68049e+08			5.78583e+08			0.709551			0.290449			1	0.7888														57.6667	60	57	56	40	43	44
T6 D S_O2_003.fcs	4750	7254	495	39954	17260			15	1000	100	4893.3	4.8933e+08			2113.89	2.11389e+08			7.00719e+08			0.698326			0.301674			1	0.654811														26.3533	28.08	25.88	25.1	71.92	74.12	74.9
T6 E S_C_001.fcs	16565	6849	468	21809	15691			15	500	100	5650.24	5.65024e+08	4.76328e+08	7.70613e+07	4065.2	4.0652e+08	4.35948e+08	3.44329e+07	9.71544e+08	9.12276e+08	5.91178e+07	0.581573	0.520341	0.0538338	0.418427	0.479659	0.0538338	1	2.4186	2.2577	0.194852			9.12276e+09									57.0467	58.65	57.11	55.38	41.35	42.89	44.62
T6 E S_C_002.fcs	16370	7076	474	17129	18523			15	500	100	4381.58	4.38158e+08			4738.16	4.73816e+08			9.11974e+08			0.48045			0.51955			1	2.31345														22.8	23.3	19.74	25.36	76.7	80.26	74.64
T6 E S_C_003.fcs	14518	7113	483	16962	17030			15	500	100	4258.01	4.25801e+08			4275.08	4.27508e+08			8.5331e+08			0.499			0.501			1	2.04105													average	54.6242
T6 E S_GP_001.fcs	11134	7463	484	15425	15266			15	500	100	3864.18	3.86418e+08	3.80115e+08	9.30149e+06	3824.34	3.82434e+08	3.83478e+08	2.14925e+07	7.68852e+08	7.63593e+08	2.93606e+07	0.50259	0.49801	0.00983308	0.49741	0.50199	0.00983308	1	1.49189	1.70091	0.201142			7.63593e+09
T6 E S_GP_002.fcs	13763	7270	467	14229	13963			15	500	100	3694.32	3.69432e+08			3625.26	3.62526e+08			7.31958e+08			0.504718			0.495282			1	1.89312
T6 E S_GP_003.fcs	12402	7220	478	15158	15985			15	500	100	3844.95	3.84495e+08			4054.73	4.05473e+08			7.89968e+08			0.486723			0.513277			1	1.71773
T6 E S_O2_001.fcs	11988	7173	478	19194	19750			15	500	100	4868.72	4.86872e+08	5.71315e+08	9.2834e+07	5009.75	5.00975e+08	4.93175e+08	6.25615e+07	9.87847e+08	1.06449e+09	1.36592e+08	0.492862	0.535791	0.0381303	0.507138	0.464209	0.0381303	1	1.67127	2.32742	1.4217			1.06449e+10
T6 E S_O2_002.fcs	25110	6343	431	23842	19603			15	500	100	6707.22	6.70722e+08			5514.71	5.51471e+08			1.22219e+09			0.548786			0.451214			1	3.95869
T6 E S_O2_003.fcs	9646	7133	470	21566	16555			15	500	100	5563.51	5.56351e+08			4270.79	4.27079e+08			9.8343e+08			0.565725			0.434275			1	1.35231
T6 F S_C_001.fcs	9658	7282	505	16283	13476			15	500	100	3909.49	3.90949e+08	3.42887e+08	4.56376e+07	3235.54	3.23554e+08	3.07854e+08	3.52565e+07	7.14503e+08	6.50741e+08	7.53351e+07	0.547162	0.526565	0.0217849	0.452838	0.473435	0.0217849	1	1.32628	1.10031	0.197602			6.50741e+09
T6 F S_C_002.fcs	7406	7299	500	12377	11030			15	500	100	3001.39	3.00139e+08			2674.75	2.67475e+08			5.67614e+08			0.528773			0.471227			1	1.01466
T6 F S_C_003.fcs	7004	7296	498	13865	13658			15	500	100	3375.73	3.37573e+08			3325.33	3.32533e+08			6.70106e+08			0.50376			0.49624			1	0.959978
T6 F S_GP_001.fcs	4937	7417	503	14704	12531			15	500	100	3544.41	3.54441e+08	3.7107e+08	1.56619e+07	3020.61	3.02061e+08	2.9576e+08	5.62136e+06	6.56503e+08	6.6683e+08	1.16781e+07	0.539894	0.55632	0.0145091	0.460106	0.44368	0.0145091	1	0.665633	0.781062	0.113448			6.6683e+09
T6 F S_GP_002.fcs	5704	7265	509	15668	12227			15	500	100	3732.27	3.73227e+08			2912.59	2.91259e+08			6.64486e+08			0.561678			0.438322			1	0.785134
T6 F S_GP_003.fcs	6487	7269	499	15867	12098			15	500	100	3855.42	3.85542e+08			2939.61	2.93961e+08			6.79503e+08			0.567388			0.432612			1	0.89242
T6 F S_O2_001.fcs	6442	7371	503	25153	18363			15	500	100	6063.16	6.06316e+08	6.22609e+08	1.5631e+07	4426.42	4.42642e+08	4.49122e+08	6.50023e+06	1.04896e+09	1.07173e+09	2.0021e+07	0.578017	0.580898	0.00502032	0.421983	0.419102	0.00502032	1	0.873966	0.913523	0.0593329			1.07173e+10
T6 F S_O2_002.fcs	7099	7231	499	25682	18752			15	500	100	6240.3	6.2403e+08			4556.42	4.55642e+08			1.07967e+09			0.577981			0.422019			1	0.981745
T6 F S_O2_003.fcs	6463	7304	498	26183	18445			15	500	100	6374.81	6.37481e+08			4490.83	4.49083e+08			1.08656e+09			0.586694			0.413306			1	0.884858
G S T6_C_001_024.fcs	2652	2217	470	29899	23397			15	500	100	8778.64	8.77864e+08	7.60851e+08	1.52242e+08	6869.59	6.86959e+08	6.39625e+08	1.2554e+08	1.56482e+09	1.40048e+09	2.72413e+08	0.560999	0.543108	0.0174066	0.439001	0.456892	0.0174066	1	1.19621	1.21276	0.0934189			1.40048e+10
G S T6_C_002_025.fcs	2464	2183	465	27495	24754			15	500	100	8159.61	8.15961e+08			7346.17	7.34617e+08			1.55058e+09			0.52623			0.47377			1	1.12872
G S T6_C_003_026.fcs	3001	2285	486	20734	17514			15	500	100	5887.29	5.88729e+08			4972.99	4.97299e+08			1.08603e+09			0.542094			0.457906			1	1.31335
G S T6_GP_001_027.fcs	2891	2225	469	34150	24322			15	500	100	10048.2	1.00482e+09	8.05938e+08	1.77242e+08	7156.4	7.1564e+08	6.13879e+08	1.63161e+08	1.72046e+09	1.41982e+09	3.16044e+08	0.58404	0.570068	0.048054	0.41596	0.429932	0.048054	1	1.29933	1.15234	0.359264			1.41982e+10
G S T6_GP_002_028.fcs	3114	2201	485	23360	14961			15	500	100	6646.6	6.6466e+08			4256.84	4.25684e+08			1.09034e+09			0.609587			0.390413			1	1.41481
G S T6_GP_003_029.fcs	1673	2252	481	26084	24410			15	500	100	7483.38	7.48338e+08			7003.11	7.00311e+08			1.44865e+09			0.516576			0.483424			1	0.742895
G S T6_O2_001_030.fcs	2550	2225	475	6919	12043			15	500	100	2010.1	2.0101e+08	2.35203e+08	4.67469e+07	3498.72	3.49872e+08	3.68026e+08	5.6698e+07	5.50883e+08	6.03229e+08	1.0135e+08	0.364888	0.388892	0.0207905	0.635112	0.611108	0.0207905	1	1.14607	1.3369	0.239165			6.03229e+09
G S T6_O2_002_031.fcs	2772	2201	470	9825	14699			15	500	100	2884.72	2.88472e+08			4315.77	4.31577e+08			7.20049e+08			0.400628			0.599372			1	1.25943
G S T6_O2_003_032.fcs	3586	2234	485	7596	11339			15	500	100	2161.28	2.16128e+08			3226.28	3.22628e+08			5.38756e+08			0.401162			0.598838			1	1.60519
G T0 S_Tube_001_001.fcs	6680	2136	470	35822	23466			15	500	100	12709	1.2709e+09	9.43184e+08	2.83809e+08	8325.29	8.32529e+08	6.73016e+08	1.38921e+08	2.10343e+09	1.6162e+09	4.22237e+08	0.604203	0.579965	0.0217787	0.395797	0.420035	0.0217787	1	3.12734	2.83203	0.538956			1.6162e+10
G T0 S_Tube_002_002.fcs	4926	2229	479	22362	16620			15	500	100	7784.55	7.78455e+08			5785.67	5.78567e+08			1.35702e+09			0.573649			0.426351			1	2.20996
G T0 S_Tube_003_003.fcs	6744	2135	470	21991	17136			15	500	100	7801.99	7.80199e+08			6079.53	6.07953e+08			1.38815e+09			0.562042			0.437958			1	3.15878
	bacteria fitc | Mean (FITC-A)	beads | Mean (FITC-A)	beads | Count	HNA' | Count	LNA | Count	PI | Count	trucount | Count	bead vol	volume	dilution	PI/ul	PI/ml	average	stdev	% PI	average	stdev																	0
031019_T0-A_Pi_001.fcs		6919	498			9254		10	500	100	1562.45	1.56245e+08	1.5231e+08	3.41892e+06	0.409189	0.398883	0.00895376
031019_T0-A_Pi_002.fcs		6973	494			8849		10	500	100	1506.17	1.50617e+08			0.394449
031019_T0-A_Pi_003.fcs		6919	499			8906		10	500	100	1500.68	1.50068e+08			0.393012																			0
031019_T0-B_Pi_001.fcs		6924	502			4214		10	500	100	705.826	7.05826e+07	8.18144e+07	1.0018e+07	0.2631	0.304967	0.0373423
031019_T0-B_Pi_002.fcs		7028	505			5395		10	500	100	898.27	8.9827e+07			0.334834
031019_T0-B_Pi_003.fcs		6914	504			5097		10	500	100	850.337	8.50337e+07			0.316967			MX	28.08	25.88	25.1	26.3533	t0		43.44	39.72	37.64	40.2667						258.8
031019_T6-A-C_Pi_001.fcs		6715	503			4479		10	500	100	748.721	7.48721e+07	7.80902e+07	8.80586e+06	0.279427	0.291437	0.032864		25.78	22.09	22.67	23.5133	gp		29.94	29.78	28.16	29.2933
031019_T6-A-C_Pi_002.fcs		6772	502			5257		10	500	100	880.524	8.80524e+07			0.328617				27.03	21.03	25.64	24.5667	ch		32.55	30.18	33.9	32.21
031019_T6-A-C_Pi_003.fcs		6715	507			4302		10	500	100	713.46	7.1346e+07			0.266268				26.48	27.26	26.13	26.6233	a		30.93	29.35	29.13	29.8033						272.6
031019_T6-A-GP_Pi_001.fcs		6700	501			3251		10	500	100	545.615	5.45615e+07	5.652e+07	1.85231e+07	0.274079	0.283917	0.0930473											#DIV/0!
031019_T6-A-GP_Pi_002.fcs		6649	501			2327		10	500	100	390.54	3.9054e+07			0.19618			RU	58.65	57.11	55.38	57.0467	t0		51.49	50.85	50.44	50.9267
031019_T6-A-GP_Pi_003.fcs		6679	498			4498		10	500	100	759.446	7.59446e+07			0.381493				46.72	51.39	53.13	50.4133	gp		57.87	56.22	53.72	55.9367						513.9
031019_T6-A-O2_Pi_001.fcs		6717	502			3929		10	500	100	658.09	6.5809e+07	6.43717e+07	5.94001e+06	0.435007	0.425506	0.0392644		61.24	63.31	58.26	60.9367	ch		52.32	61.23	62.49	58.68
031019_T6-A-O2_Pi_002.fcs		6731	498			3426		10	500	100	578.449	5.78449e+07			0.382363				47.42	49.37	31.72	42.8367	a		41.83	37.76	36.79	38.7933
031019_T6-A-O2_Pi_003.fcs		6759	498			4114		10	500	100	694.611	6.94611e+07			0.459148							#DIV/0!						#DIV/0!						0
031019_T6-B-C_Pi_001.fcs		6720	497			3545		10	500	100	599.745	5.99745e+07	7.62842e+07	1.44784e+07	0.167935	0.213604	0.0405411	tk	23.3	19.74	25.36	22.8	t0		40.84	42.69	30.1	37.8767
031019_T6-B-C_Pi_002.fcs		6696	500			4832		10	500	100	812.576	8.12576e+07			0.22753				21.25	25.17	25.7	24.04	gp		23.83	20.58	19.72	21.3767
031019_T6-B-C_Pi_003.fcs		6700	492			5127		10	500	100	876.204	8.76204e+07			0.245347				27.3	26.7	26.92	26.9733	ch		52.42	73.85	47.19	57.82						267
031019_T6-B-GP_Pi_001.fcs		6722	502			5747		10	500	100	962.597	9.62597e+07	8.60074e+07	9.02192e+06	0.400475	0.357822	0.0375344		26.68	17.15	18.61	20.8133	a		13.69	18.64	20.3	17.5433
031019_T6-B-GP_Pi_002.fcs		6670	499			4705		10	500	100	792.804	7.92804e+07			0.329835							#DIV/0!						#DIV/0!
031019_T6-B-GP_Pi_003.fcs		6673	499			4895		10	500	100	824.82	8.2482e+07			0.343155			pi				#DIV/0!						#DIV/0!						0
031019_T6-B-O2_Pi_001.fcs		6645	492			9974		10	500	100	1704.56	1.70456e+08	1.47246e+08	2.19089e+07	0.511938	0.442232	0.0658	mx	10	8	20	12.6667	t0		13	5	9	9
031019_T6-B-O2_Pi_002.fcs		6780	492			8447		10	500	100	1443.59	1.44359e+08			0.433561				38	16	14	22.6667	gp		16	20	18	18
031019_T6-B-O2_Pi_003.fcs		6692	494			7457		10	500	100	1269.24	1.26924e+08			0.381198				11	10	10.5	10.5	ch		30	26	11	22.3333						100
B T0 P_Tube_001_008.fcs		2141	489			6851		20	500	75	2771.38	2.07854e+08	2.51556e+08	3.79411e+07	0.149803	0.1813	0.0273447		26	25	27	26	a		16	16	43	25
B T0 P_Tube_002_009.fcs		2104	488			9081		20	500	75	3680.99	2.76074e+08			0.198971							#DIV/0!						#DIV/0!
B T0 P_Tube_003_010.fcs		2113	490			8942		20	500	75	3609.85	2.70739e+08			0.195126			ru	5	4	4	4.33333	t0		13	12	8	11						40
B T6 A P_Tube_001_038.fcs		2044	412			7342		15	500	100	2058.68	2.05868e+08	2.14626e+08	1.66558e+07	0.214926	0.224071	0.0173887		9	8	7	8	gp		10	9	15	11.3333
B T6 A P_Tube_002_039.fcs		2043	485			9817		15	500	100	2338.34	2.33834e+08			0.244124				11	5	9	8.33333	ch		15	11	12	12.6667
B T6 A P_Tube_003_040.fcs		2029	494			8731		15	500	100	2041.77	2.04177e+08			0.213162				7	10	9	8.66667	a		11	15	14	13.3333						100
B T6 CH P_Tube_001_032.fcs		2069	477			7972		15	500	100	1930.72	1.93072e+08	2.11412e+08	3.8836e+07	0.219323	0.240157	0.0441163					#DIV/0!	t0					#DIV/0!
B T6 CH P_Tube_002_033.fcs		2073	488			10815		15	500	100	2560.22	2.56022e+08			0.290832			tk	15	17	20	17.3333	gp		3	3	1	2.33333
B T6 CH P_Tube_003_034.fcs		2060	492			7885		15	500	100	1851.43	1.85143e+08			0.210316				54	23	32	36.3333	ch		31	39	45	38.3333						230
B T6 GP P_Tube_001_035.fcs		2025	482			7544		15	500	100	1808.11	1.80811e+08	1.87602e+08	9.33852e+06	0.164085	0.170248	0.00847464		59	47	21	42.3333	a		44	26	27	32.3333
B T6 GP P_Tube_002_036.fcs		2075	486			7730		15	500	100	1837.44	1.83744e+08			0.166747				25	40	41	35.3333			52	35	28	38.3333
B T6 GP P_Tube_003_037.fcs		2042	484			8306		15	500	100	1982.52	1.98252e+08			0.179912																			0
B TO P_Tube_001_007.fcs		2197	496			7871		20	500	75	3139.06	2.35429e+08	2.62552e+08	2.5876e+07	0.21365	0.238264	0.0234823
B TO P_Tube_002_008.fcs		2180	487			9420		20	500	75	3826.25	2.86969e+08			0.260422
B TO P_Tube_003_009.fcs		2147	490			8761		20	500	75	3536.78	2.65259e+08			0.240721																			0
C T0 P_Tube_001_011.fcs		2075	485			14452		15	500	75	4420.78	3.31558e+08	3.08622e+08	2.76658e+07	0.285997	0.266213	0.0238641
C T0 P_Tube_002_012.fcs		2101	490			13934		15	500	75	4218.83	3.16412e+08			0.272932
C T0 P_Tube_003_013.fcs		2067	485			12113		15	500	75	3705.29	2.77897e+08			0.239709																			0
C T6 A P_Tube_001_047.fcs		2092	482			7844		10	500	100	1253.34	1.25334e+08	1.32737e+08	6.43534e+06	0.281153	0.297759	0.0144359
C T6 A P_Tube_002_048.fcs		2025	373			6635		10	500	100	1369.97	1.36997e+08			0.307315
C T6 A P_Tube_003_049.fcs		2037	482			8504		10	500	100	1358.8	1.3588e+08			0.30481																			0
C T6 CH P_Tube_001_041.fcs		2051	484			7093		10	500	100	1128.66	1.12866e+08	1.09735e+08	4.43736e+06	0.274737	0.267113	0.0108013
C T6 CH P_Tube_002_042.fcs		2051	309			4199		10	500	100	1046.57	1.04657e+08			0.254753
C T6 CH P_Tube_003_043.fcs		2071	483			7004		10	500	100	1116.81	1.11681e+08			0.271851																			0
C T6 GP P_Tube_001_044.fcs		2074	371			6048		10	500	100	1255.5	1.2555e+08	1.12194e+08	1.1712e+07	0.342935	0.306453	0.0319909
C T6 GP P_Tube_002_045.fcs		2049	362			5046		10	500	100	1073.54	1.07354e+08			0.293233
C T6 GP P_Tube_003_046.fcs		2077	472			6354		10	500	100	1036.78	1.03678e+08			0.283191																			0
T0 D P_Tube_001.fcs		7061	506			1760		15	500	100	745.294	7.45294e+07	6.96827e+07	4.82467e+06	0.0803952	0.0751671	0.00520439
T0 D P_Tube_002.fcs		7162	516			1677		15	500	100	696.384	69638400			0.0751192
T0 D P_Tube_003.fcs		6988	501			1517		15	500	100	648.804	6.48804e+07			0.0699867																			0
T0 E P_Tube_001.fcs		6989	506			6066		15	500	100	2568.72	2.56872e+08	2.22769e+08	2.96602e+07	0.208438	0.180765	0.0240677
T0 E P_Tube_002.fcs		6979	500			4864		15	500	100	2084.44	2.08444e+08			0.169141
T0 E P_Tube_003.fcs		7150	509			4822		15	500	100	2029.9	2.0299e+08			0.164716																			0
T0 F P_Tube_001.fcs		7119	507			2088		15	500	100	882.446	8.82446e+07	8.80903e+07	2.13887e+06	0.0638107	0.0636991	0.00154664
T0 F P_Tube_002.fcs		7091	505			2024		15	500	100	858.785	8.58785e+07			0.0620997
T0 F P_Tube_003.fcs		7045	502			2112		15	500	100	901.479	9.01479e+07			0.065187																			0
T6 D P_C_001.fcs		6826	500			4125		15	1000	100	500.151	5.00151e+07	4.6583e+07	3.04382e+06	0.0788452	0.0734348	0.00479837
T6 D P_C_002.fcs		6786	499			3639		15	1000	100	442.108	4.42108e+07			0.0696952
T6 D P_C_003.fcs		6831	497			3732		15	1000	100	455.231	4.55231e+07			0.071764																			0
T6 D P_GP_001.fcs		6849	497			3335		15	500	100	813.61	8.1361e+07	7.74349e+07	3.41578e+06	0.204545	0.194675	0.00858742
T6 D P_GP_002.fcs		6889	501			3105		15	500	100	751.451	7.51451e+07			0.188918
T6 D P_GP_003.fcs		6783	501			3132		15	500	100	757.986	7.57986e+07			0.190561																			0
T6 D P_O2_001.fcs		6739	496			3593		15	1000	100	439.16	4.3916e+07	4.71527e+07	2.80316e+06	0.0687898	0.0738598	0.00439085
T6 D P_O2_002.fcs		6814	506			4069		15	1000	100	487.511	4.87511e+07			0.0763635
T6 D P_O2_003.fcs		6910	499			4016		15	1000	100	487.911	4.87911e+07			0.0764261																			0
T6 E P_C_001.fcs		6868	502			9460		15	500	100	2284.89	2.28489e+08	1.89187e+08	3.47585e+07	0.25046	0.207379	0.0381009
T6 E P_C_002.fcs		6926	502			7311		15	500	100	1765.83	1.76583e+08			0.193564
T6 E P_C_003.fcs		6819	501			6714		15	500	100	1624.88	1.62488e+08			0.178113																			0
T6 E P_GP_001.fcs		6803	498			8641		15	500	100	2103.84	2.10384e+08	2.02503e+08	1.11441e+07	0.275518	0.265198	0.0145943
T6 E P_GP_002.fcs		6890	504			8090		15	500	100	1946.23	1.94623e+08			0.254879
									500		#DIV/0!	#DIV/0!			#DIV/0!																			0
T6 E P_O2_001.fcs		6787	500			11543		15	500	100	2799.15	2.79915e+08	2.51379e+08	2.47159e+07	0.262957	0.23615	0.0232186
T6 E P_O2_002.fcs		6838	499			9742		15	500	100	2367.14	2.36714e+08			0.222374
T6 E P_O2_003.fcs		6865	503			9853		15	500	100	2375.08	2.37508e+08			0.223119																			0
T6 F P_C_001.fcs		6793	496			2283		15	500	100	558.086	5.58086e+07	6.42553e+07	8.95326e+06	0.0857617	0.0987417	0.0137586
T6 F P_C_002.fcs		6849	500			2611		15	500	100	633.161	6.33161e+07			0.0972984
T6 F P_C_003.fcs		6908	503			3055		15	500	100	736.411	7.36411e+07			0.113165																			0
T6 F P_GP_001.fcs		6820	499			3430		15	500	100	833.433	8.33433e+07	8.9949e+07	8.53697e+06	0.124984	0.13489	0.0128023
T6 F P_GP_002.fcs		6861	501			4115		15	500	100	995.885	9.95885e+07			0.149346
T6 F P_GP_003.fcs		6814	499			3577		15	500	100	869.151	8.69151e+07			0.130341																			0
T6 F P_O2_001.fcs		6768	499			7891		15	500	100	1917.38	1.91738e+08	1.84932e+08	6.33765e+06	0.178905	0.172554	0.00591347
T6 F P_O2_002.fcs		6808	499			7375		15	500	100	1792	1.792e+08			0.167206
T6 F P_O2_003.fcs		6826	501			7597		15	500	100	1838.58	1.83858e+08			0.171552																			0
G T0 P_Tube_001_010.fcs		2138	482			2754		15	500	100	952.742	9.52742e+07	1.12194e+08	2.52839e+07	0.0589495	0.0694182	0.015644
G T0 P_Tube_002_011.fcs		2098	480			2880		15	500	100	1000.48	1.00048e+08			0.0619034
G T0 P_Tube_003_012.fcs		2142	490			4151		15	500	100	1412.59	1.41259e+08			0.0874017																			0
G T6 P_C_001_015.fcs		2096	484			3655		15	500	100	1042.1	1.0421e+08	9.73934e+07	1.16068e+07	0.0744106	0.069543	0.00828777
G T6 P_C_002_016.fcs		2082	474			2885		15	500	100	839.916	8.39916e+07			0.0599736
G T6 P_C_003_017.fcs		2070	488			3677		15	500	100	1039.78	1.03978e+08			0.0742449																			0
G T6 P_GP_001_018.fcs		2088	480			2513		15	500	100	722.47	7.2247e+07	7.91558e+07	8.39249e+06	0.0508847	0.0557507	0.00591097
G T6 P_GP_002_019.fcs		2092	484			2691		15	500	100	767.25	7.6725e+07			0.0540387
G T6 P_GP_003_020.fcs		2084	482			3091		15	500	100	884.953	8.84953e+07			0.0623287																			0
G T6 P_O2_001_021.fcs		2090	478			2037		15	500	100	588.073	5.88073e+07	5.79234e+07	802737	0.0974876	0.0960222	0.00133073
G T6 P_O2_002_022.fcs		2097	480			1991		15	500	100	572.398	5.72398e+07			0.0948891
G T6 P_O2_003_023.fcs		2090	492			2058		15	500	100	577.23	5.7723e+07			0.09569																			0
			rainbow count	pbs	beads	trucount	trucount				beads/ul
031019_trucount_001.fcs	A B	7016	508	500	10	50400	609				4204.14
T0 D E F beads 100919_Tube_001.fcs	FL Gi YE	6717	496	500	10	50400	350				7142.4																							0
T6 beads D E F 100919_Tube_001.fcs	FL Gi YE	6927	504	500	15	50400	419				4041.62
BDS OCT 11 G T0_Tube_001_013.fcs	VFVF	2015	488	500	15	50400	295				5558.24
BEAD oCT 11 G t6_Tube_001_014.fcs	VFVF	2141	486	500	15	50400	355				4599.89																							0
T0 BEADS B C OCT 16_Tube_001_004.fcs	LL MI	2166	496	500	15	50400	337				4945.28
bds t6 B C oct 16_Tube_001_050.fcs	LL MI	2164	612	500	15	50400	534				3850.79
																																		0
