# Supplementary material for: Effects of oxygen exposure on relative nucleic acid content and membrane integrity in the human gut microbiota
Source: PeerJ. 2021 Feb 3;9:e10602. doi: 10.7717/peerj.10602 (PMC7866891; doi:10.7717/peerj.10602)
Supplement: Supplemental Information 2 — Raw data obtained after acquisition on the Calibur flow cytometer for 9 of the 19 individuals in Figure 2 A and B. Fresh fecal samples were immediately placed in the anaerobic chamber, prepared as discussed in the methods, and stained with either Sybr Green I or with PI. Each sample was stained and acquired in triplicate, with values averaged. Data presented in the manuscript correspond to the averages. The letter codes for each individual is the same as in the Figure 1. Sample label and gated counts for cells and reference beads are provided. Cell abundances are obtained using the gated counts on FlowJo, reference beads concentration, and sample volume. The columns contain the counts for each gate (beads, HNA, LNA, PI), and the rows represent the different samples with the first letter representing the individual, followed by the stain, and by the staining techical replicate.Proportions of HNA, LNA, and Pi cells are calculated relative to the total cell counts obtained by SybrGreen staining. [file peerj-09-10602-s002.xlsx]

## Sheet: Flow cytometry Raw data
Raw data obtained after acquisition on the Calibur flow cytometer for 9 of the 19 individuals in Figure 2 A and B. Fresh fecal samples were immediately placed in the anaerobic chamber, prepared as discussed in the methods, and stained with either Sybr Green I or with PI. Each sample was stained and acquired in triplicate, with values averaged. Data presented in the manuscript correspond to the av…
Sample label (individual_stain_technical replicate)	beads | Count	HNA | Count	LNA | Count	PI | Count	rainbow | Count	countbright | Count	$DATE
Q-PI.001	284			187			03-Feb-16
Q-PI.002	157			297			03-Feb-16
Q-PI.003	157			286			03-Feb-16
Q-Sybr.001	86	2810	4500				03-Feb-16
Q-Sybr.002	19	3454	3681				03-Feb-16
Q-Sybr.003	41	3157	4158				03-Feb-16
O-PI.001	212			17321			13-Jan-16
O-PI.002	303			17507			13-Jan-16
O-PI.003	200			15931			13-Jan-16
O-Sybr.001	260	22161	23392				13-Jan-16
O-Sybr.002	193	7	0				13-Jan-16
O-Sybr.003	226	25276	24789				13-Jan-16
P-PI.001	225			19017			13-Jan-16
P-PI.002	250			17773			13-Jan-16
P-PI.003	167			16918			13-Jan-16
P-Sybr.001	291	21592	33597				13-Jan-16
P-Sybr.002	268	19571	39191				13-Jan-16
P-Sybr.003	285	22493	32481				13-Jan-16
Countbright Beads.001	23				0	23	04-Mar-16
Countbright Beads.002					348	17	04-Mar-16
Countbright-M-.001					0	162	02-Feb-16
Countbright.001					0	0	29-Feb-16
Countbright.002					529	0	29-Feb-16
Countbrightbeads.001					1	75	23-Feb-16
Countbrightbeads.002					809	84	23-Feb-16
Coutbright.001							22-Feb-16
Coutbright.002							22-Feb-16
K-PI.001	1004			95			19-Jan-16
K-PI.002	948			127			19-Jan-16
K-PI.003	640			51			19-Jan-16
K-Sybr.001	885	1135	1547				19-Jan-16
K-Sybr.002	1103	1192	1643				19-Jan-16
K-Sybr.003	806	1187	1650				19-Jan-16
L-PI.001	755			65			19-Jan-16
L-PI.002	764			122			19-Jan-16
L-PI.003	769			87			19-Jan-16
L-Sybr.001	1457	1642	986				19-Jan-16
L-Sybr.002	1395	0	0				19-Jan-16
L-Sybr.003	850	1601	961				19-Jan-16
M-PI.001	388			244			02-Feb-16
M-PI.002	263			298			02-Feb-16
M-PI.003	275			276			02-Feb-16
M-Sybr.001	161	2800	2948				02-Feb-16
M-Sybr.002	66	2461	2962				02-Feb-16
M-Sybr.003	68	2797	2980				02-Feb-16
H-PI.004	554			80			19-Jan-16
H-PI.001	454			108			27-Jan-16
H-PI.002	332			108			27-Jan-16
H-PI.003	221			133			27-Jan-16
H-Pi.001	345			598			29-Feb-16
H-Pi.002	283			337			29-Feb-16
H-Pi.003	375			495			29-Feb-16
H-Sybr.001	461	720	3988				29-Feb-16
H-Sybr.002	177	604	2494				29-Feb-16
H-Sybr.003	162	901	5064				29-Feb-16
S-PI.004	148			1847			20-Jan-16
S-PI.005	127			0			20-Jan-16
S-PI.006	0			0			20-Jan-16
S-PI.001	495			55			27-Jan-16
S-PI.002	438			145			27-Jan-16
S-PI.003	355			134			27-Jan-16
S-Sybr.001	411	1528	1930				27-Jan-16
S-Sybr.002	282	2056	2192				27-Jan-16
S-Sybr.003	373	1559	2349				27-Jan-16
S-Pi.001	341			558			04-Mar-16
S-Pi.002	319			440			04-Mar-16
S-Pi.003	307			430			04-Mar-16
S-SYBR.001	68	728	2920				04-Mar-16
S-SYBR.002	54	495	2764				04-Mar-16
S-SYBR.003	74	663	2437				04-Mar-16
N-PI.001	289			162			02-Feb-16
N-PI.002	311			192			02-Feb-16
N-PI.003	300			147			02-Feb-16
N-Sybr.001	121	2427	3942				02-Feb-16
N-Sybr.002	55	2039	3507				02-Feb-16
N-Sybr.003	82	2286	3806				02-Feb-16
TruCount-WG51.001					1303	5	01-Feb-16
TruCount-WG51.002					1744	5	01-Feb-16
TruCount.001					1300	5	01-Feb-16
TruCount.002					1739	5	01-Feb-16
R-PI.001	342			594			22-Jan-16
R-PI.002	355			528			22-Jan-16
R-PI.003	302			439			22-Jan-16
R-Sybr.001	251	4831	5137				22-Jan-16
R-Sybr.002	268	4670	5066				22-Jan-16
R-Sybr.003	208	4609	5218				22-Jan-16
F-Sybr.001	801	1611	1871				22-Feb-16
F-Sybr.002	547	2081	1645				22-Feb-16
F-Sybr.003	526	936	743				22-Feb-16

## Sheet: Cell counts-ind M
Calculations from raw counts imported from Flowjo to cell counts per ml, using the reference bead concentration for individual M. The formula is referenced in the manuscript. Data used in the figures is the average %HNA and average %PI.
	Beads	Countbright	vol beads	Volume H2O	[Countbright]	Total Countbright (beads/uL)	bds/uL
Countbright+beads.001	1191	186	10	1000	0.55*10^5 beads/50uL	11	7043.55
Tube label (code_stain)	Beads	HNA	LNA	Total cells	vol beads	HNA/uL	HNA/mL	average/mL	stdev	LNA/uL	LNA/mL	average/mL	stdev	Total cells/uL	Total cells/mL	average/mL	stdev	%HNA	average	stdev	%LNA	average	stdev
JR26-Sybr.001	161	2800	2948	5748	10	1224.96	1.22496e+10	2.24951e+10	7.32849e+09	644.857	6.44857e+09	1.25625e+10	4.32587e+09	1869.82	1.86982e+10	3.50576e+10	1.16071e+10	65.5124	64.3955	1.39395	34.4876	35.6045	1.39395
JR26-Sybr.002	66	2461	2962	5423	10	2626.39	2.62639e+10			1580.53	1.58053e+10			4206.92	4.20692e+10			62.4302			37.5698
JR26-Sybr.003	68	2797	2980	5777	10	2897.18	2.89718e+10			1543.37	1.54337e+10			4440.54	4.44054e+10			65.2438			34.7562
	Beads	PI	vol beads	cells/uL	cells/mL	average/mL	stdev	%PI	average	stdev
JR26-PI.001	365	993	10	191.623	1.91623e+09	2.2094e+09	4.00022e+08	5.46595	6.30219	1.14104
JR26-PI.002	249	981	10	277.499	2.77499e+09			7.91551
JR26-PI.003	264	726	10	193.698	1.93698e+09			5.52512

## Sheet: Cell counts-ind N
	Beads	Countbright	vol beads	Volume H2O	[Countbright]	Total Countbright (beads/uL)	bds/uL
Calculations from raw counts imported from Flowjo to cell counts per ml, using the reference bead concentration for individual N. The formula is referenced in the manuscript. Data used in the figures is the average %HNA and average %PI.
Countbright+beads.001	1191	186	10	1000	0.55*10^5 beads/50uL	11	7043.55
Tube label (code_stain)	Beads	HNA	LNA	Total cells	vol beads	HNA/uL	HNA/mL	average/mL	stdev	LNA/uL	LNA/mL	average/mL	stdev	Total cells/uL	Total cells/mL	average/mL	stdev	%HNA	average	stdev	%LNA	average	stdev
P431-Sybr.001	121	2427	3942	6369	10	1412.78	1.41278e+10	1.99587e+10	4.89797e+09	1147.34	1.14734e+10	1.67586e+10	4.49314e+09	2560.13	2.56013e+10	3.67173e+10	9.39072e+09	55.1842	54.5066	0.581596	44.8158	45.4934	0.581596
P431-Sybr.002	55	2039	3507	5546	10	2611.24	2.61124e+10			2245.61	2.24561e+10			4856.85	4.85685e+10			53.764			46.236
P431-Sybr.003	82	2286	3806	6092	10	1963.6	1.9636e+10			1634.62	1.63462e+10			3598.22	3.59822e+10			54.5715			45.4285
	Beads	PI	vol beads	cells/uL	cells/mL	average/mL	stdev	%PI	average	stdev
P431-PI.001	277	855	10	217.409	2.17409e+09	2.23798e+09	8.6514e+07	5.92116	6.09516	0.235622
P431-PI.002	302	1012	10	236.029	2.36029e+09			6.42827
P431-PI.003	286	885	10	217.956	2.17956e+09			5.93605

## Sheet: Cell counts-ind R
Calculations from raw counts imported from Flowjo to cell counts per ml, using the reference bead concentration for individual R. The formula is referenced in the manuscript. Data used in the figures is the average %HNA and average %PI.
	Beads	Countbright	vol beads	Volume H2O	[Countbright]	Total Countbright (beads/uL)	bds/uL
Countbright+beads.001	671	45	10	1000	0.55*10^5 beads/50uL	11	16402.2
Tube label (code_stain)	Beads	HNA	LNA	Total cells	vol beads	HNA/uL	HNA/mL	average/mL	stdev	LNA/uL	LNA/mL	average/mL	stdev	Total cells/uL	Total cells/mL	average/mL	stdev	%HNA	average	stdev	%LNA	average	stdev
XS90-Sybr.001	251	4831	5137	9968	10	3156.94	3.15694e+10	3.21653e+10	3.19738e+09	1678.45	1.67845e+10	1.76203e+10	2.153e+09	4835.39	4.83539e+10	4.97856e+10	5.3367e+09	65.2882	64.6588	0.598376	34.7118	35.3412	0.598376
XS90-Sybr.002	268	4670	5066	9736	10	2858.15	2.85815e+10			1550.25	1.55025e+10			4408.4	4.4084e+10			64.8341			35.1659
XS90-Sybr.003	208	4609	5218	9827	10	3634.51	3.63451e+10			2057.37	2.05737e+10			5691.89	5.69189e+10			63.8543			36.1457
	Beads	PI	vol beads	cells/uL	cells/mL	average/mL	stdev	%PI	average	stdev
XS90-PI.001	326	1099	10	552.946	5.52946e+09	5.61498e+09	1.80379e+08	11.1065	11.2783	0.362312
XS90-PI.002	338	1123	10	544.961	5.44961e+09			10.9462
XS90-PI.003	295	1055	10	586.588	5.86588e+09			11.7823

## Sheet: Cell counts-ind Q
Calculations from raw counts imported from Flowjo to cell counts per ml, using the reference bead concentration for individual Q. The formula is referenced in the manuscript. Data used in the figures is the average %HNA and average %PI.
	Beads	Countbright	vol beads	Volume H2O	[Countbright]	Total Countbright (beads/uL)	bds/uL
Countbright+beads.001	634	142	10	1000	0.55*10^5 beads/50uL	11	4911.27
Tube label (code_stain)	Beads	HNA	LNA	Total cells	vol beads	HNA/uL	HNA/mL	average/mL	stdev	LNA/uL	LNA/mL	average/mL	stdev	Total cells/uL	Total cells/mL	average/mL	stdev	%HNA	average	stdev	%LNA	average	stdev
AD40-Sybr.001	86	2810	4500	7310	10	1604.73	1.60473e+10	4.77152e+10	3.07062e+10	1284.92	1.28492e+10	2.84425e+10	1.43957e+10	2889.65	2.88965e+10	7.61578e+10	4.5087e+10	55.5336	60.3551	3.96184	44.4664	39.6449	3.96184
AD40-Sybr.002	19	3454	3681	7135	10	8928.17	8.92817e+10			4757.47	4.75747e+10			13685.6	1.36856e+11			65.2375			34.7625
AD40-Sybr.003	41	3157	4158	7315	10	3781.68	3.78168e+10			2490.37	2.49037e+10			6272.05	6.27205e+10			60.2941			39.7059
	Beads	PI	vol beads	cells/uL	cells/mL	average/mL	stdev	%PI	average	stdev
AD40-PI.001	268	918	10	168.229	1.68229e+09	2.65475e+09	6.88606e+08	5.82178	4.362	1.48306
AD40-PI.002	152	986	10	318.586	3.18586e+09			2.32789
AD40-PI.003	148	933	10	309.609	3.09609e+09			4.93633

## Sheet: Cell counts-ind F
Calculations from raw counts imported from Flowjo to cell counts per ml, using the reference bead concentration for individual F. The formula is referenced in the manuscript. Data used in the figures is the average %HNA and average %PI.
	Beads	Countbright	vol beads	Volume H2O	[Countbright]	Total Countbright (beads/uL)	bds/uL
Countbright+beads.001	271	51	10	1000	0.55*10^5 beads/50uL	11	5845.1
Tube label (code_stain)	Beads	HNA	LNA	Total cells	vol beads	HNA/uL	HNA/mL	average/mL	stdev	LNA/uL	LNA/mL	average/mL	stdev	Total cells/uL	Total cells/mL	average/mL	stdev	%HNA	average	stdev	%LNA	average	stdev
YE93-Sybr.001	278	1499	3035	4534	20	630.345	6.30345e+09	1.69283e+10	7.85694e+09	638.125	6.38125e+09	1.77019e+10	8.67493e+09	1268.47	1.26847e+10	3.46303e+10	1.65118e+10	49.6934	49.2037	1.07275	50.3066	50.7963	1.07275
YE93-Sybr.002	112	1861	3692	5553	20	1942.45	1.94245e+10			1926.79	1.92679e+10			3869.25	3.86925e+10			50.2023			49.7977
YE93-Sybr.003	76	1629	3570	5199	20	2505.7	2.5057e+10			2745.66	2.74566e+10			5251.36	5.25136e+10			47.7153			52.2847
	Beads	PI	vol beads	cells/uL	cells/mL	average/mL	stdev	%PI	average	stdev
YE93-PI.001	543	640	20	137.785	1.37785e+09	2.58537e+09	8.59192e+08	10.8623	8.41908	2.04834
YE93-PI.002	233	659	20	330.637	3.30637e+09			8.54525
YE93-PI.003	274	720	20	307.188	3.07188e+09			5.84968

## Sheet: Cell counts-ind P
Calculations from raw counts imported from Flowjo to cell counts per ml, using the reference bead concentration for individual P. The formula is referenced in the manuscript. Data used in the figures is the average %HNA and average %PI.
	Beads	Countbright	vol beads	Volume H2O	[Countbright]	Total Countbright (beads/uL)	bds/uL
Countbright+beads.001	422	103	10	1000	0.55*10^5 beads/50uL	11	4506.8
Tube label (code_stain)	Beads	HNA	LNA	Total cells	vol beads	HNA/uL	HNA/mL	average/mL	stdev	LNA/uL	LNA/mL	average/mL	stdev	Total cells/uL	Total cells/mL	average/mL	stdev	%HNA	average	stdev	%LNA	average	stdev
AF70-Sybr.001	291	21592	33597	55189	10	3344.01	1.67201e+11	1.69867e+11	5.74303e+09	2601.63	2.60163e+11	2.82168e+11	3.35147e+10	5945.64	4.27364e+11	4.52036e+11	2.98807e+10	39.1237	37.7817	3.24854	60.8763	62.2183	3.24854
AF70-Sybr.002	268	19571	39191	58762	10	3291.14	1.64557e+11			3295.26	3.29526e+11			6586.4	4.94083e+11			33.3055			66.6945
AF70-Sybr.003	285	22493	32481	54974	10	3556.89	1.77845e+11			2568.16	2.56816e+11			6125.05	4.34661e+11			40.9157			59.0843
	Beads	PI	vol beads	cells/uL	cells/mL	average/mL	stdev	%PI	average	stdev
AF70-PI.001	220	15510	10	3177.29	1.58865e+11	1.6252e+11	2.86571e+10	35.1443	35.9529	6.33956
AF70-PI.002	254	14585	10	2587.86	1.29393e+11			28.6245
AF70-PI.003	164	14505	10	3986.04	1.99302e+11			44.0899

## Sheet: Cell counts-ind L
Calculations from raw counts imported from Flowjo to cell counts per ml, using the reference bead concentration for individual L. The formula is referenced in the manuscript. Data used in the figures is the average %HNA and average %PI.
	Beads	Countbright	vol beads	Volume H2O	[Countbright]	Total Countbright (beads/uL)	bds/uL
Countbright+beads.001	952	67	10	1000	0.55*10^5 beads/50uL	11	15629.9
Tube label (code_stain)	Beads	HNA	LNA	Total cells	vol beads	HNA/uL	HNA/mL	average/mL	stdev	LNA/uL	LNA/mL	average/mL	stdev	Total cells/uL	Total cells/mL	average/mL	stdev	%HNA	average	stdev	%LNA	average	stdev
IC55-Sybr.001	1457	1642	986	2628	10	176.144	8.80721e+09	7.84228e+09	6.04788e+09	52.8862	2.64431e+09	2.35401e+09	1.81518e+09	229.03	1.14515e+10	1.52944e+10	3.84293e+09	76.9087	76.9122	0.00351035	23.0913	23.0878	0.00351035
IC55-Sybr.002	1395	0	0	0	10	0	0			0	0			0	0			#DIV/0!			#DIV/0!
IC55-Sybr.003	850	1601	961	2562	10	294.393	1.47196e+10			88.3546	4.41773e+09			382.747	1.91374e+10			76.9157			23.0843
	Beads	PI	vol beads	cells/uL	cells/mL	average/mL	stdev	%PI	average	stdev
IC55-PI.001	716	488	10	106.527	5.32637e+09	6.2637e+09	1.53719e+09	34.8255	40.9541	10.0506
IC55-PI.002	723	780	10	168.621	8.43104e+09			55.1248
IC55-PI.003	739	476	10	100.674	5.0337e+09			32.9119

## Sheet: Cell counts-ind K
Calculations from raw counts imported from Flowjo to cell counts per ml, using the reference bead concentration for individual K. The formula is referenced in the manuscript. Data used in the figures is the average %HNA and average %PI.
	Beads	Countbright	vol beads	Volume H2O	[Countbright]	Total Countbright (beads/uL)	bds/uL
Countbright+beads.001	952	67	10	1000	0.55*10^5 beads/50uL	11	15629.9
Tube label (code_stain)	Beads	HNA	LNA	Total cells	vol beads	HNA/uL	HNA/mL	average/mL	stdev	LNA/uL	LNA/mL	average/mL	stdev	Total cells/uL	Total cells/mL	average/mL	stdev	%HNA	average	stdev	%LNA	average	stdev
EW44-Sybr.001	885	1135	1547	2682	10	200.451	1.00225e+10	9.99237e+09	1.25088e+09	136.607	6.83033e+09	6.88331e+09	8.90237e+08	337.057	1.68529e+10	1.68757e+10	2.14021e+09	59.4708	59.2224	0.194446	40.5292	40.7776	0.194446
EW44-Sybr.002	1103	1192	1643	2835	10	168.91	8.4455e+09			116.409	5.82045e+09			285.319	1.4266e+10			59.2004			40.7996
EW44-Sybr.003	806	1187	1650	2837	10	230.182	1.15091e+10			159.983	7.99915e+09			390.165	1.95082e+10			58.996			41.004
	Beads	PI	vol beads	cells/uL	cells/mL	average/mL	stdev	%PI	average	stdev
EW44-PI.001	980	367	10	58.5322	2.92661e+09	2.89828e+09	4.58852e+08	17.3422	17.1743	2.71901
EW44-PI.002	932	277	10	46.4535	2.32268e+09			13.7635
EW44-PI.003	626	276	10	68.9112	3.44556e+09			20.4173

## Sheet: Cell counts-ind O
Calculations from raw counts imported from Flowjo to cell counts per ml, using the reference bead concentration for individual O. The formula is referenced in the manuscript. Data used in the figures is the average %HNA and average %PI.
	Beads	Countbright	vol beads	Volume H2O	[Countbright]	Total Countbright (beads/uL)	bds/uL
Countbright+beads.001	422	103	10	1000	0.55*10^5 beads/50uL	11	4506.8
Tube label (code_stain)	Beads	HNA	LNA	Total cells	vol beads	HNA/uL	HNA/mL	average/mL	stdev	LNA/uL	LNA/mL	average/mL	stdev	Total cells/uL	Total cells/mL	average/mL	stdev	%HNA	average	stdev	%LNA	average	stdev
AE19-Sybr.001	260	22161	23392	45553	10	3841.35	1.92068e+11	1.48057e+11	1.07459e+11	2027.36	2.02736e+11	1.49967e+11	1.07583e+11	5868.72	3.94804e+11	4.46996e+11	5.21917e+10	48.6488	49.5676	0.918771	51.3512	50.4324	0.918771
AE19-Sybr.002	193	7	0	7	10	1.63459	8.17295e+07			0	0			1.63459	8.17295e+07			100			0
AE19-Sybr.003	226	25276	24789	50065	10	5040.43	2.52022e+11			2471.66	2.47166e+11			7512.09	4.99187e+11			50.4864			49.5136
	Beads	PI	vol beads	cells/uL	cells/mL	average/mL	stdev	%PI	average	stdev
AE19-PI.001	209	12945	10	2791.41	1.39571e+11	1.2926e+11	2.2036e+10	31.2241	28.9175	4.9298
AE19-PI.002	303	13263	10	1972.73	9.86364e+10			22.0665
AE19-PI.003	199	13209	10	2991.47	1.49574e+11			33.462
