# Supplementary material for: Effects of oxygen exposure on relative nucleic acid content and membrane integrity in the human gut microbiota
Source: PeerJ. 2021 Feb 3;9:e10602. doi: 10.7717/peerj.10602 (PMC7866891; doi:10.7717/peerj.10602)
Supplement: Supplemental Information 3 — Raw data of longitudinal study of individual H. Fresh fecal samples were immediately placed in an anaerobic chamber twice a week for 2 months, to assess the intra-individual variation over time in the proportions of HNA and PI+ cells in the human gut microbiota. Raw data from the gates imported from FlowJo are noted, each column is a unique gate, and rows are samples over time. [file peerj-09-10602-s003.xls]

## Sheet: H - Longitudinal Raw FCM
Raw data of longitudinal study of individual H. Fresh fecal samples were immediately placed in an anaerobic chamber twice a week for 2 months, to assess the intra-individual variation over time in the proportions of HNA and PI+ cells in the human gut microbiota. Raw data from the gates imported from FlowJo are noted, each column is a unique gate, and rows are samples over time.
Sample label (individual_stain_technical replicate)	LNA | Count	HNA | Count	beads | Count	PI | Count	$DATE	$DATE	Date
H-PI.001			454	108	2016-01-27	2016-01-27	2016-01-27
H-PI.002			332	108	2016-01-27	2016-01-27	2016-01-27
H-PI.003			221	133	2016-01-27	2016-01-27	2016-01-27
H-PI.001			291	238	2016-02-02	2016-02-02	2016-02-02
H-PI.002			325	259	2016-02-02	2016-02-02	2016-02-02
H-PI.003			251	304	2016-02-02	2016-02-02	2016-02-02
H-Sybr.001	5930	2283	175		2016-02-02	2016-02-02	2016-02-02
H-Sybr.002	5213	2803	94		2016-02-02	2016-02-02	2016-02-02
H-Sybr.003	4822	2932	61		2016-02-02	2016-02-02	2016-02-02
H-PI.001			111	376	2016-02-03	2016-02-03	2016-02-03
H-PI.002			81	323	2016-02-03	2016-02-03	2016-02-03
H-PI.003			159	337	2016-02-03	2016-02-03	2016-02-03
H-Sybr.001	3565	2321	111		2016-02-03	2016-02-03	2016-02-03
H-Sybr.002	3382	2356	25		2016-02-03	2016-02-03	2016-02-03
H-Sybr.003	3553	2345	30		2016-02-03	2016-02-03	2016-02-03
H-PI.001			259	350	2016-03-07	2016-03-07	2016-03-07
H-PI.002			191	324	2016-03-07	2016-03-07	2016-03-07
H-PI.003			252	559	2016-03-07	2016-03-07	2016-03-07
H-Sybr.001	4315	1995	74		2016-03-07	2016-03-07	2016-03-07
H-Sybr.002	3926	2043	19		2016-03-07	2016-03-07	2016-03-07
H-Sybr.003	4621	2853	39		2016-03-07	2016-03-07	2016-03-07
H-PI.001			452	226	2016-03-09	2016-03-09	2016-03-09
H-PI.002			677	301	2016-03-09	2016-03-09	2016-03-09
H-PI.003			598	257	2016-03-09	2016-03-09	2016-03-09
H-Sybr.001	4551	2340	242		2016-03-09	2016-03-09	2016-03-09
H-Sybr.002	3936	2064	143		2016-03-09	2016-03-09	2016-03-09
H-Sybr.003	5747	2338	81		2016-03-09	2016-03-09	2016-03-09
H-PI.001			207	13142	2016-01-13	2016-01-13	2016-01-13
H-PI.002			196	13217	2016-01-13	2016-01-13	2016-01-13
H-PI.003			172	13368	2016-01-13	2016-01-13	2016-01-13
H-Sybr.001	14448	34089	13		2016-01-13	2016-01-13	2016-01-13
H-Sybr.002	27164	28253	245		2016-01-13	2016-01-13	2016-01-13
H-Sybr.003	24318	26754	190		2016-01-13	2016-01-13	2016-01-13
H-PI.001			362	653	2016-02-17	2016-02-17	2016-02-17
H-PI.002			255	752	2016-02-17	2016-02-17	2016-02-17
H-PI.003			334	645	2016-02-17	2016-02-17	2016-02-17
H-Sybr.001	4068	3968	179		2016-02-17	2016-02-17	2016-02-17
H-Sybr.002	4810	3776	93		2016-02-17	2016-02-17	2016-02-17
H-Sybr.003	4844	4169	109		2016-02-17	2016-02-17	2016-02-17
H-PI.001			265	63	2016-01-19	2016-01-19	2016-01-19
H-PI.002			268	30	2016-01-19	2016-01-19	2016-01-19
H-PI.003			789	106	2016-01-19	2016-01-19	2016-01-19
H-PI.004			554	80	2016-01-19	2016-01-19	2016-01-19
H-Sybr.001	1472	913	860		2016-01-19	2016-01-19	2016-01-19
H-Sybr.002	1455	1219	697		2016-01-19	2016-01-19	2016-01-19
H-Sybr.003	1596	1255	1140		2016-01-19	2016-01-19	2016-01-19
H-PI.001			480	255	2016-02-22	2016-02-22	2016-02-22
H-PI.002			676	441	2016-02-22	2016-02-22	2016-02-22
H-PI.003			831	426	2016-02-22	2016-02-22	2016-02-22
H-Sybr.001	3305	716	106		2016-02-22	2016-02-22	2016-02-22
H-Sybr.002	5462	1957	81		2016-02-22	2016-02-22	2016-02-22
H-Sybr.003	4248	903	182		2016-02-22	2016-02-22	2016-02-22
H-PI.001			368	200	2016-01-22	2016-01-22	2016-01-22
H-PI.002			297	220	2016-01-22	2016-01-22	2016-01-22
H-PI.003			365	242	2016-01-22	2016-01-22	2016-01-22
H-Sybr.001	7337	2885	494		2016-01-22	2016-01-22	2016-01-22
H-Sybr.002	8188	2922	135		2016-01-22	2016-01-22	2016-01-22
H-Sybr.003	6648	3319	586		2016-01-22	2016-01-22	2016-01-22
H-PI.001			671	554	2016-02-24	2016-02-24	2016-02-24
H-PI.002			472	587	2016-02-24	2016-02-24	2016-02-24
H-PI.003			538	453	2016-02-24	2016-02-24	2016-02-24
H-Sybr.001		853	158		2016-02-24	2016-02-24	2016-02-24
H-Sybr.002	1758	947	107		2016-02-24	2016-02-24	2016-02-24
H-Sybr.003	1515	852	84		2016-02-24	2016-02-24	2016-02-24
H-PI.001			454	108	2016-01-27	2016-01-27	2016-01-27
H-PI.002			332	108	2016-01-27	2016-01-27	2016-01-27
H-PI.003			221	133	2016-01-27	2016-01-27	2016-01-27
H-Sybr.001	5973	3404	201		2016-01-27	2016-01-27	2016-01-27
H-Sybr.002	6766	3192	140		2016-01-27	2016-01-27	2016-01-27
H-Sybr.003	6731	3277	133		2016-01-27	2016-01-27	2016-01-27

## Sheet: S - Longitudinal Raw FCM
Raw data of longitudinal study of individual S. Fresh fecal samples were immediately placed in an anaerobic chamber twice a week for 2 months, to assess the intra-individual variation over time in the proportions of HNA and PI+ cells in the human gut microbiota. Raw data from the gates imported from FlowJo are noted, each column is a unique gate, and rows are samples over time.
Sample label (individual_stain_technical replicate)	LNA | Count	HNA | Count	beads | Count	PI | Count	$DATE	$DATE	Date
S-PI.001			423	148	2016-02-02	2016-02-02	2016-02-02
S-PI.002			373	109	2016-02-02	2016-02-02	2016-02-02
S-PI.003			216	193	2016-02-02	2016-02-02	2016-02-02
S-Sybr.001	2331	1839	151		2016-02-02	2016-02-02	2016-02-02
S-Sybr.002	2480	1402	116		2016-02-02	2016-02-02	2016-02-02
S-Sybr.003	2274	1616	88		2016-02-02	2016-02-02	2016-02-02
S-PI.001			288	145	2016-02-03	2016-02-03	2016-02-03
S-PI.002			239	160	2016-02-03	2016-02-03	2016-02-03
S-PI.003			170	268	2016-02-03	2016-02-03	2016-02-03
S-Sybr.001	1369	1128	83		2016-02-03	2016-02-03	2016-02-03
S-Sybr.002	1231	1088	29		2016-02-03	2016-02-03	2016-02-03
S-Sybr.003	1362	994	51		2016-02-03	2016-02-03	2016-02-03
S-PI.001			395	236	2016-03-08	2016-03-08	2016-03-08
S-PI.002			249	261	2016-03-08	2016-03-08	2016-03-08
S-PI.003			363	235	2016-03-08	2016-03-08	2016-03-08
S-Sybr.001	1415	883	116		2016-03-08	2016-03-08	2016-03-08
S-Sybr.002	1492	874	58		2016-03-08	2016-03-08	2016-03-08
S-Sybr.003	1593	1042	42		2016-03-08	2016-03-08	2016-03-08
S-PI.001			400	111	2016-03-09	2016-03-09	2016-03-09
S-PI.002			234	322	2016-03-09	2016-03-09	2016-03-09
S-PI.003			562	329	2016-03-09	2016-03-09	2016-03-09
S-Sybr.001	2334	686	240		2016-03-09	2016-03-09	2016-03-09
S-Sybr.002	3390	1450	80		2016-03-09	2016-03-09	2016-03-09
S-Sybr.003	2931	1146	132		2016-03-09	2016-03-09	2016-03-09
S-PI.001			216	17828	2016-01-13	2016-01-13	2016-01-13
S-PI.002			244	17062	2016-01-13	2016-01-13	2016-01-13
S-PI.003			257	18284	2016-01-13	2016-01-13	2016-01-13
S-Sybr.001	34823	22188	269		2016-01-13	2016-01-13	2016-01-13
S-Sybr.002	34439	21534	261		2016-01-13	2016-01-13	2016-01-13
S-Sybr.003	45619	17455	337		2016-01-13	2016-01-13	2016-01-13
S-pi.001			30	506	2016-02-16	2016-02-16	2016-02-16
S-pi.002			65	396	2016-02-16	2016-02-16	2016-02-16
S-pi.003			45	508	2016-02-16	2016-02-16	2016-02-16
S-sybr.001	11113	5022	46		2016-02-16	2016-02-16	2016-02-16
S-sybr.002	8672	4746	20		2016-02-16	2016-02-16	2016-02-16
S-sybr.003	11497	7713	10		2016-02-16	2016-02-16	2016-02-16
S-PI.001			560	189	2016-02-17	2016-02-17	2016-02-17
S-PI.002			438	266	2016-02-17	2016-02-17	2016-02-17
S-PI.003			380	338	2016-02-17	2016-02-17	2016-02-17
S-Sybr.001	2153	1159	149		2016-02-17	2016-02-17	2016-02-17
S-Sybr.002	2343	1181	91		2016-02-17	2016-02-17	2016-02-17
S-Sybr.003	2116	790	123		2016-02-17	2016-02-17	2016-02-17
S-PI.001			923	134	2016-01-19	2016-01-19	2016-01-19
S-PI.002			735	130	2016-01-19	2016-01-19	2016-01-19
S-PI.003			708	137	2016-01-19	2016-01-19	2016-01-19
S-Sybr.001	1954	757	1031		2016-01-19	2016-01-19	2016-01-19
S-Sybr.002	2028	778	1222		2016-01-19	2016-01-19	2016-01-19
S-Sybr.003	1918	1133	831		2016-01-19	2016-01-19	2016-01-19
S-PI.001			267	115	2016-01-22	2016-01-22	2016-01-22
S-PI.002			454	185	2016-01-22	2016-01-22	2016-01-22
S-PI.003			400	163	2016-01-22	2016-01-22	2016-01-22
S-Sybr.001	3106	1394	416		2016-01-22	2016-01-22	2016-01-22
S-Sybr.002	3151	2051	417		2016-01-22	2016-01-22	2016-01-22
S-Sybr.003	3034	1887	346		2016-01-22	2016-01-22	2016-01-22
S-PI.001			391	185	2016-02-23	2016-02-23	2016-02-23
S-PI.002			478	216	2016-02-23	2016-02-23	2016-02-23
S-PI.003			361	297	2016-02-23	2016-02-23	2016-02-23
S-Sybr.001	2855	814	120		2016-02-23	2016-02-23	2016-02-23
S-Sybr.002	2761	721	67		2016-02-23	2016-02-23	2016-02-23
S-Sybr.003	2570	931	87		2016-02-23	2016-02-23	2016-02-23
S-PI.001			495	55	2016-01-27	2016-01-27	2016-01-27
S-PI.002			438	145	2016-01-27	2016-01-27	2016-01-27
S-PI.003			355	134	2016-01-27	2016-01-27	2016-01-27
S-Sybr.001	1930	1528	411		2016-01-27	2016-01-27	2016-01-27
S-Sybr.002	2192	2056	282		2016-01-27	2016-01-27	2016-01-27
S-Sybr.003	2349	1559	373		2016-01-27	2016-01-27	2016-01-27

## Sheet: Longitudinal Summary
Summary of cell counts for both individuals over time. Cell counts were calcualted using bead concentrations in "longitudinal raw FCM" tabs. Data used in the Figure 2 is the average of the staining technical replicates.
Individual H						Individual S
Date	HNA	LNA	PI	Cell #		Date	HNA	LNA	PI	Cell #
2020-01-13			20.5803			2020-01-13	56.031	43.969	49.5402	3.31723e+11
	50.9826	49.0174	19.3109	5.097e+11			55.5666	44.4334	51.7507	3.34586e+11
	52.3849	47.6151	22.0785	6.05713e+11			43.3508	56.6492	46.4588	2.69234e+11
2020-01-19	55.3669	44.6331	51.0958	1.49847e+10		2020-01-19	43.6563	56.3437	44.667	1.31436e+10
	62.6252	37.3748	30.4744	2.18246e+10			43.4152	56.5848	42.0747	1.14602e+10
	61.1301	38.8699	40.84	1.40737e+10			54.1587	45.8413	48.3283	1.96737e+10
2020-01-22	44.0223	55.9777	5.39524	2.17595e+10		2020-01-22	47.3023	52.6977	32.2377	1.16196e+10
	41.6477	58.3523	6.38868	8.5243e+10			56.5559	43.4441	24.8873	1.42644e+10
	49.9624	50.0376	6.32969	1.85939e+10			55.4348	44.5652	26.9907	1.61368e+10
2020-01-27	53.2666	46.7334	2.12199	4.87622e+10		2020-01-27	61.2916	38.7084	9.43099	9.30304e+09
	48.5475	51.4525	3.97594	7.20298e+10			65.2284	34.7716	12.18	1.71428e+10
	49.3338	50.6662	5.32024	7.65992e+10			57.0331	42.9669	12.9192	1.12397e+10
2020-02-02	43.5023	56.4977	4.26413	2.11226e+10		2020-02-02	61.2082	38.7918	7.07881	1.40148e+10
	51.8162	48.1838	3.67476	4.05341e+10			53.0659	46.9341	7.17582	1.60423e+10
	54.8755	45.1245	4.90554	6.16946e+10			58.6996	41.3004	9.62901	2.20351e+10
2020-02-03	56.5615	43.4385	6.6386	1.81562e+10		2020-02-03	61.3974	38.6026	10.573	1.09675e+10
	58.216	41.784	11.2704	79503600000			63.5349	36.4651	13.8241	2.9871e+10
	56.8968	43.1032	5.61173	6.74726e+10			60.3443	39.6557	19.3886	1.65009e+10
2020-02-17	66.1113	33.8887	1.81604	5.03464e+10		2020-02-17	51.8452	48.1548	1.93979	2.25275e+10
	61.0904	38.9096	7.21578	9.97932e+10			50.2019	49.7981	3.24197	38816250000
	63.2529	36.7471	4.11781	9.07925e+10			42.7489	57.2511	4.8113	2.25591e+10
2020-02-22	30.2301	69.7699	11.5347	1.97699e+10		2020-02-24	72.6656	27.3344	16.7807	1.30292e+10
	41.7449	58.2551	4.03244	5.12082e+10			65.421	34.579	20.5511	1.92662e+10
	29.8315	70.1685	11.4867	1.47156e+10			75.802	24.198	18.1414	1.58896e+10
2020-02-24	49.4206	50.5794	11.6762	8.88243e+09		2020-03-09	37.021	62.979	9.40785	9.02581e+09
	51.862	48.138	20.752	1.3876e+10			46.1049	53.8951	21.3858	4.59571e+10
	52.9357	47.0643	18.0542	1.55797e+10			43.8828	56.1172	8.40635	2.3128e+10
2020-03-07	48.0433	51.9567	3.95049	3.33322e+10
	50.9985	49.0015	5.81687	1.2524e+11
	55.2532	44.7468	4.68967	7.86441e+10
2020-03-09	50.6987	49.3013	5.13327	2.22959e+10
	51.1905	48.8095	3.91808	3.29614e+10
	44.8623	55.1377	3.75582	7.52141e+10
