# Supplementary material for: Effects of oxygen exposure on relative nucleic acid content and membrane integrity in the human gut microbiota
Source: PeerJ. 2021 Feb 3;9:e10602. doi: 10.7717/peerj.10602 (PMC7866891; doi:10.7717/peerj.10602)
Supplement: Supplemental Information 6 — Sample codes in column A are labeled as follows: timepoint - one letter to identify the individual - storage condition (C for Chamber, A or G for anaerobic gas pack) - the stain - the technical replicate - the date for individuals A-G (Fig 2A, B) obtained after acquisition on the Canto flow cytometer. Sample label, mean fluorescence and scatter, gated counts for cells and reference beads, volumes of beads and sample are all provided. Cell abundances are obtained using the gated counts on FlowJo, reference beads concentration (noted on sheet "Beads concentration"), and sample volume. Proportions of HNA, LNA, and Pi cells are calculated relative to the total cell counts obtained by SybrGreen staining. Rows highlighted in yellow correspond to samples where we averaged the bead counts from the other two technical replicates due to a technical issue during acquisition (clog, bubble, or beads that were too concentrated). Values in column V and AG were used as data points in the figures. [file peerj-09-10602-s006.xlsx]

## Sheet: Raw counts and cell abundances
Raw data and Flow cytometry cell counts for Figure 3 C, D. Sample codes in column A are labeled as follows: timepoint - one letter to identify the individual - storage condition (C for Chamber, A or G for anaerobic gas pack) - the stain - the technical replicate - the date for individuals A-G (Fig 2A, B) obtained after acquisition on the Canto flow cytometer. Sample label, mean fluorescence and s…
Sample					Physiological fraction
Label (time point_individual_stain)	beads | Count	HNA | Count	HNA | Mean (FL1-H)	LNA | Count	LNA | Mean (FL1-H)	PI | Count	PI | Mean (FL3-H)	vol beads	HNA/ul	HNA/ml	average/ml	stdev	LNA/ul	LNA/ml	average	stdev	total cells	average	stdev	%HNA	average	stdev	%LNA	average	stdev	%total	PI/ul	PI/ml	average/ml	stdev	% PI	average	stdev
T0 R-PI.001 4	170	0	n/a			5967	11.6	20																			8536.32	426816000000	4.96708e+11	5.97428e+10	0.12913	0.150275	0.0180747
T0 R-PI.002 4	179	9	372			7221	10.5	20																			9810.88	4.90544e+11			0.14841
T0 R-PI.003 4	166	0	n/a			7819	10.5	20																			11455.3	5.72765e+11			0.173286
T0 R-Sybr.001 4	42.5	3087	338	6999	85.3	33	10.1	20	17664.9	8.83245e+11	1.03598e+12	1.96015e+11	40050.7	2.00254e+12	2.26935e+12	2.75246e+11	2.88578e+12	3.30532e+12	4.69575e+11	30.6068	31.1539	1.45175	69.3932	68.8461	1.45175			0
T0 R-Sybr.002 4	41	4426	142	8929	36.7	2	11.2	20	26253.7	1.31269e+12			52964.2	2.64821e+12			3.9609e+12			33.1411			66.8589					0
T0 R-Sybr.003 4	44	3300	312	7806	73.5	0	n/a	20	18240	912000000000			43145.9	2.15729e+12			3.06929e+12			29.7137			70.2863					0
T2 R-A-PI.001 4	68	0	n/a			3452	10.7	20		0				0													12346	6.17299e+11	6.15842e+11	6.31959e+10	0.182557	0.182126	0.0186893
T2 R-A-PI.002 4	59	0	n/a			3360	10.5	20		0				0													13850	6.92502e+11			0.204797
T2 R-A-PI.003 4	77	2	459			3405	10.6	20		0				0													10754.5	5.37725e+11			0.159024
T2 R-A-Sybr.001 4	71	6106	231	12687	54.8	3	9.07	20	20915.2	1045760000000	1.18128e+12	1.01054e+11	43457.4	2.17287e+12	2.20012e+12	5.55352e+10	3.21863e+12	3.3814e+12	1.16821e+11	32.4908	34.8838	2.03739	67.5092	65.1162	2.03739			0
T2 R-A-Sybr.002 4	74	7362	209	13860	48.9	7	13.5	20	24195.1	1.20976e+12			45550.7	2.27754e+12			3.48729e+12			34.6904			65.3096					0
T2 R-A-Sybr.003 4	77	8158	138	13614	32.7	18	10.5	20	25766.6	1.28833e+12			42999	2.14995e+12			3.43828e+12			37.4701			62.5299					0
T2 R-C-PI.001 4	58	0	n/a			2665	10.5	20		0				0													11174.6	5.58731e+11	6.47123e+11	8.35355e+10	0.101058	0.117045	0.015109
T2 R-C-PI.002 4	63	6	476			3230	10.1	20		0				0													12468.8	6.23441e+11			0.112762
T2 R-C-PI.003 4	53	0	n/a			3309	10.2	20		0				0													15183.9	7.59197e+11			0.137316
T2 R-C-Sybr.001 4	51	10666	113	17508	29.1	0	n/a	20	50862.2	2.54311e+12	1.94912e+12	4.76554e+11	83489.1	4.17446e+12	3.57972e+12	4.23009e+11	6.71757e+12	5.52884e+12	8.59507e+11	37.8576	34.8181	3.98139	62.1424	65.1819	3.98139			0
T2 R-C-Sybr.002 4	48	7610	159	12736	40.4	5	10	20	38557.3	1.92787e+12			64529.1	3.22645e+12			5154320000000			37.4029			62.5971					0
T2 R-C-Sybr.003 4	53	5999	721	14550	124	0	n/a	20	27527.5	1.37637e+12			66765.3	3.33826e+12			4.71464e+12			29.1936			70.8064					0
T4 R-A-PI.001 4	138	0	n/a			6711	11.4	20		0				0													11826.9	5.91346e+11	#NAME?	4.89824e+10	0.0643135	0.0714563	0.00532722
T4 R-A-PI.002 4	135	0	n/a			7447	10.8	20		0				0													13415.6	6.70782e+11			0.0729528
T4 R-A-PI.003 4	133	0	n/a			7754	10.7	20		0				0													14178.7	7.08937e+11			0.0771025
T4 R-A-Sybr.001 4	65	8345	571	18548	142	0	n/a	20	31223.1	1.56116e+12	2.66864e+12	1.12467e+12	69398.1	3.4699e+12	6.52609e+12	2.82713e+12	5.03106e+12	9.19474e+12	3.94779e+12	31.0304	29.2687	1.3568	68.9696	70.7313	1.3568			0
T4 R-A-Sybr.002 4	33	11428	560	27916	131	0	n/a	20	84220.9	4.21104e+12			205732	1.02866e+13			1.44977e+13			29.0464			70.9536					0
T4 R-A-Sybr.003 4	59	10838	531	28247	114	0	n/a	20	44674.6	2.23373e+12			116435	5.82175e+12			8.05548e+12			27.7293			72.2707					0
T4 R-C-PI.001 4	155	0	n/a			7976	10.8	20		0				0													12514.6	6.2573e+11	1.42657e+12	5.81777e+11	0.108878	0.248226	0.10123
T4 R-C-PI.002 4	47	0	n/a			7693	10.5	20		0				0													39807.2	1.99036e+12			0.346327
T4 R-C-PI.003 4	58	0	n/a			7935	10.6	20		0				0													33272.3	1.66361e+12			0.289472
T4 R-C-Sybr.001 4	101	13007	306	26546	65.9	0	n/a	20	31319.8	1.56599e+12	1.88468e+12	3.65231e+11	63920.7	3.19603e+12	3.86238e+12	7.56794e+11	4.76202e+12	5.74706e+12	1.12202e+12	32.885	32.8027	0.0594676	67.115	67.1973	0.0594676			0
T4 R-C-Sybr.002 4	97	13497	211	27682	44.9	0	n/a	20	33839.9	1.692e+12			69404.8	3.47024e+12			5.16223e+12			32.7764			67.2236					0
T4 R-C-Sybr.003 4	93	18325	300	37635	63.2	0	n/a	20	47920.9	2.39604e+12			98417.5	4.92088e+12			7.31692e+12			32.7466			67.2534					0
T6 R-A-PI.001 4	93	0	n/a	0	n/a	3060	12.3	20		0				0													8002.06	4.00103e+11	4.22284e+11	2.16277e+10	0.193038	0.20374	0.0104347
T6 R-A-PI.002 4	79	0	n/a	0	n/a	2934	12.2	20		0				0													9032.26	4.51613e+11			0.21789
T6 R-A-PI.003 4	86	0	n/a	0	n/a	2936	12.2	20		0				0													8302.73	4.15137e+11			0.200292
T6 R-A-Sybr.001 4	72	4365	1040	5321	204	0	n/a	20	14744	737200000000	9.50586e+11	1.51007e+11	17973.2	8.98658e+11	1.12208e+12	1.82951e+11	1.63586e+12	2.07266e+12	3.24134e+11	45.065	45.8608	1.81093	54.935	54.1392	1.81093			0
T6 R-A-Sybr.002 4	45	3940	1091	4984	203	1	6.79	20	21293.5	1.06468e+12			26935.8	1.34679e+12			2.41146e+12			44.1506			55.8494					0
T6 R-A-Sybr.003 4	59	5094	545	5438	113	0	n/a	20	20997.6	1.04988e+12			22415.6	1.12078e+12			2.17066e+12			48.3669			51.6331					0
T6 R-C-PI.001 4	225	0	n/a	0	n/a	5094	13.7	20		0				0													5506.05	275302400000	6.31358e+11	3.25388e+11	0.193147	0.44295	0.228287
T6 R-C-PI.002 4	55	0	n/a	0	n/a	2519	12.2	20		0				0													11138.6	556928000000			0.390731
T6 R-C-PI.003 4	31	0	n/a	0	n/a	2707	12.3	20		0				0													21236.9	1.06184e+12			0.74497
T6 R-C-Sybr.001 4	111	4521	958	5132	168	0	n/a	20	9905.47	4.95274e+11	6.6587e+11	1.95852e+11	11244.2	5.62208e+11	7.59479e+11	1.72099e+11	1.05748e+12	1.42535e+12	3.64328e+11	46.8352	46.3693	2.2982	53.1648	53.6307	2.2982			0
T6 R-C-Sybr.002 4	98.5	4554	907	5951	185	0	n/a	20	11244	5.62199e+11			14693.2	7.34662e+11			1.29686e+12			43.3508			56.6492					0
T6 R-C-Sybr.003 4	86	6649	290	6942	59.8	0	n/a	20	18802.8	9.40138e+11			19631.3	9.81567e+11			1.9217e+12			48.9221			51.0779					0
T0 H-PI.001 4	38	0	n/a	1	103	1808	10.6	10		0				0													5785.6	289280000000	2.85211e+11	6.08101e+10	0.101352	0.0999268	0.0213055
T0 H-PI.002 4	37	0	n/a	8	101	2176	10.3	10		0				0													7151.39	3.5757e+11			0.125278
T0 H-PI.003 4	56	1	229	125	84.2	1923	10.7	10		0				0													4175.66	2.08783e+11			0.0731494
T0 H-Sybr.001 4	54	3465	257	8329	60.1	0	n/a	20	15605.3	7.80267e+11	9.07754e+11	9.46798e+10	37511.3	1.87557e+12	1.94644e+12	1.45742e+11	2.65583e+12	2.8542e+12	2.17171e+11	29.3793	31.7716	1.90254	70.6207	68.2284	1.90254			0
T0 H-Sybr.002 4	49.5	4099	154	8750	36.5	0	n/a	20	20138.9	1.00695e+12			42989.9	2.14949e+12			3.15644e+12			31.9013			68.0987					0
T0 H-Sybr.003 4	45	3464	253	6714	59.3	0	n/a	20	18721	9.3605e+11			36285.4	1814272000000			2.75032e+12			34.0342			65.9658					0
T2 H-A-PI.001 4	164	9	359	3	92.5	3083	10.5	10		0				0													2285.93	1.14297e+11	1.8067e+11	4.73381e+10	0.0387004	0.0611743	0.0160285
T2 H-A-PI.002 4	99	0	n/a	0	n/a	3359	10.7	10		0				0													4125.8	2.0629e+11			0.0698491
T2 H-A-PI.003 4	98	0	n/a	0	n/a	3569	9.87	10		0				0													4428.47	2.21424e+11			0.0749733
T2 H-A-Sybr.001 4	90	7129	215	13568	52.1	0	n/a	20	19264.1	9.63207e+11	1.07817e+12	9.92638e+10	36663.8	1.83319e+12	1.8752e+12	1.10368e+11	2.79639e+12	2.95337e+12	1.21466e+11	34.4446	36.4936	2.88027	65.5554	63.5064	2.88027			0
T2 H-A-Sybr.002 4	87	7626	149	14498	34.5	0	n/a	20	21317.7	1.06589e+12			40527.7	2.02639e+12			3.09227e+12			34.4694			65.5306					0
T2 H-A-Sybr.003 4	88.5	8773	83.3	12853	22.8	0	n/a	20	24108.4	1.20542e+12			35320.3	1.76602e+12			2.97144e+12			40.5669			59.4331					0
T2 H-C-PI.001 4	465	0	n/a	0	n/a	4527	8.12	10		0				0													1183.83	5.91917e+10	5.02304e+11	5.29495e+10	0.0255661	0.144049	0.0151847
T2 H-C-PI.002 4	114	0	n/a	0	n/a	10411	11.4	10		0				0													11105.1	5.55253e+11			0.159234
T2 H-C-PI.003 4	129	0	n/a	0	n/a	9534	11.6	10		0				0													8987.09	4.49354e+11			0.128864
T2 H-C-Sybr.001 4	118	8286	72.3	14181	22.8	0	n/a	20	17077.6	8.53879e+11	1.48718e+12	6.33297e+11	29227.3	1.46136e+12	1.99986e+12	5.38494e+11	2.31524e+12	3.48703e+12	1.17179e+12	36.8808	41.198	4.31721	63.1192	58.802	4.31721			0
T2 H-C-Sybr.002 4	36	118	327	1827	54.7	0	n/a	20	797.156	3.98578e+10			12342.4	617120000000			6.56978e+11			6.06684			93.9332					0
T2 H-C-Sybr.003 4	63	10986	52	13151	17.7	0	n/a	20	42409.4	2.12047e+12			50767	2.53835e+12			4.65882e+12			45.5152			54.4848					0
T4 H-A-PI.001 4	74	0	n/a	0	n/a	5986	10.8	10		0				0													9836.45	4.91823e+11	5.98469e+11	7.5551e+10	0.0464734	0.0565506	0.00713897
T4 H-A-PI.002 4	69	0	n/a	0	n/a	7461	10.6	10		0				0													13148.7	6.57433e+11			0.0621222
T4 H-A-PI.003 4	80	0	n/a	0	n/a	8502	10.4	10		0				0													12923	646152000000			0.0610563
T4 H-A-Sybr.001 4	89	13315	235	28414	51.3	0	n/a	20	36384.4	1.81922e+12	3.32146e+12	1.50224e+12	77643.6	3.88218e+12	7.26144e+12	3.37926e+12	5.7014e+12	1.05829e+13	4.8815e+12	31.9083	31.5503	0.357988	68.0917	68.4497	0.357988			0
T4 H-A-Sybr.002 4	30	214	339	4775	54.2	0	n/a	20	1734.83	8.67413e+10			38709.3	1.93547e+12			2.02221e+12			4.28944			95.7106					0
T4 H-A-Sybr.003 4	35	13884	169	30627	36.3	0	n/a	20	96474	4.8237e+12			212814	1.06407e+13			1.54644e+13			31.1923			68.8077					0
T4 H-C-PI.001 4	163	0	n/a	0	n/a	8053	10.4	10		0				0													6007.64	3.00382e+11	4.25115e+11	1.12125e+11	0.0265991	0.0376443	0.0099288
T4 H-C-PI.002 4	125	0	n/a	0	n/a	8279	10.7	10		0				0													8053.81	402690560000			0.0356586
T4 H-C-PI.003 4	89	0	n/a	0	n/a	8377	10.6	10		0				0													11445.4	5.72271e+11			0.0506752
T4 H-C-Sybr.001 4	48	13125	272	24659	75	0	n/a	20	66500	3325000000000	3.695e+12	3.72414e+11	124939	6.24695e+12	7.59794e+12	1.06459e+12	9.57195e+12	1.12929e+13	1.42161e+12	34.7369	32.8472	1.35976	65.2631	67.1528	1.35976			0
T4 H-C-Sybr.002 4	44	15214	198	32019	48.7	0	n/a	20	84091.9	4.2046e+12			176978	8.84889e+12			1.30535e+13			32.2105			67.7895					0
T4 H-C-Sybr.003 4	52	15204	233	32919	51	0	n/a	20	71107.9	3.5554e+12			153960	7.69798e+12			1.12534e+13			31.594			68.406					0
T6 H-A-PI.001 4	63	0	n/a	0	n/a	2359	12.2	10		0				0													4553.24	2.27662e+11	3.11906e+11	8.90496e+10	0.0420255	0.0575766	0.0164382
T6 H-A-PI.002 4	89	0	n/a	0	n/a	6369	12.2	10		0				0													8701.91	4.35096e+11			0.0803169
T6 H-A-PI.003 4	76	0	n/a	0	n/a	3412	11.1	10		0				0													5459.2	272960000000			0.0503873
T6 H-A-Sybr.001 4	30	5733	702	7323	122	0	n/a	20	46475.5	2323776000000	2.36028e+12	3.48619e+10	59365.1	2968256000000	3.05696e+12	1.16775e+11	5292032000000	5.41724e+12	1.50686e+11	43.9108	43.5856	0.585619	56.0892	56.4144	0.585619			0
T6 H-A-Sybr.002 4	27	5345	958	7154	189	0	n/a	20	48144.6	2.40723e+12			64439	3.22195e+12			5.62918e+12			42.7634			57.2366					0
T6 H-A-Sybr.003 4	33	6377	434	8089	84.2	0	n/a	20	46996.6	2.34983e+12			59613.5	2.98067e+12			5.3305e+12			44.0827			55.9173					0
T6 H-C-PI.001 4	146	0	n/a	0	n/a	5426	12.4	10		0				0													4519.19	2.25959e+11	5.99649e+11	3.8234e+11	0.0724621	0.192299	0.122611
T6 H-C-PI.002 4	45	0	n/a	0	n/a	8326	12.3	10		0				0													22498.7	1.12494e+12			0.360751
T6 H-C-PI.003 4	192	0	n/a	0	n/a	14149	12.1	10		0				0													8961.03	4.48052e+11			0.143684
T6 H-C-Sybr.001 4	98	11237	219	13944	47.9	0	n/a	20	27886.1	1.39431e+12	1.41564e+12	6.21336e+10	34603.9	1.73019e+12	1.70267e+12	7.03273e+10	3.1245e+12	3.11831e+12	1.2793e+11	44.6249	45.3961	0.548166	55.3751	54.6039	0.548166
T6 H-C-Sybr.002 4	102.5	12645	337	14934	76.2	0	n/a	20	30002.6	1.50013e+12			35433.6	1.77168e+12			3.27181e+12			45.8501			54.1499
T6 H-C-Sybr.003 4	107	11901	124	14133	28.5	0	n/a	20	27049.7	1.35249e+12			32122.9	1.60614e+12			2.95863e+12			45.7133			54.2867
														0
T0 J-PI.001 5	688	1	253	3	106	1684	48.2	20						0													624.463	3.12231e+10	3.05937e+10	6.29401e+08	0.215001	0.210667	0.00433402
T0 J-PI.002 5	580	0	n/a	0	n/a	401	39.6	20						0													176.388	8.81941e+09			0.0404099
T0 J-PI.003 5	149	4	484	3	132	350	39.6	20						0													599.287	2.99643e+10			0.206333
T0 J-Sybr.001 5	655	1498	190	1901	33.9	16	7.64	20	583.477	2.91738e+10	5.88866e+10	2.14984e+10	740.447	3.70223e+10	8.63367e+10	4.16665e+10	6.61962e+10	1.45223e+11	6.22201e+10	44.0718	41.8303	3.90017	55.9282	58.1697	3.90017			0
T0 J-Sybr.002 5	229	1424	185	2494	29.3	3	7.79	20	1586.45	7.93227e+10			2778.52	1.38926e+11			2.18249e+11			36.3451			63.6549					0
T0 J-Sybr.003 5	393	2100	110	2559	18.2	1	9.82	20	1363.26	6.81632e+10			1661.23	8.30617e+10			1.51225e+11			45.0741			54.9259					0
T2 J-A-PI.001 5	169	0	n/a	0	n/a	207	21.6	20		0				0													312.49	1.56245e+10	2.30368e+10	8.40467e+09	0.115821	0.170767	0.0623019
T2 J-A-PI.002 5	77	0	n/a	10	100	210	28.3	20		0				0													695.795	3.47898e+10			0.257889
T2 J-A-PI.003 5	262	8	255	6	71.5	384	28.5	20		0				0													373.924	1.86962e+10			0.138591
T2 J-A-Sybr.001 5	460	985	1560	1119	254	0	n/a	20	546.3	2.7315e+10	5.82382e+10	2.61584e+10	620.619	3.1031e+10	7.6664e+10	4.25459e+10	5.8346e+10	1.34902e+11	6.85697e+10	46.8156	44.5235	2.77416	53.1844	55.4765	2.77416			0
T2 J-A-Sybr.002 5	141	1009	1461	1475	259	1	7.52	20	1825.68	9.12841e+10			2668.86	1.33443e+11			2.24727e+11			40.62			59.38					0
T2 J-A-Sybr.003 5	213	937	1499	1094	281	0	n/a	20	1122.31	5.61155e+10			1310.36	6.5518e+10			1.21634e+11			46.1349			53.8651					0
T2 J-C-PI.001 5	592	0	n/a	0	n/a	195	34.9	20		0				0													84.0361	4.20181e+09	5.20953e+09	7.94723e+08	0.0155381	0.0192646	0.00293885
T2 J-C-PI.002 5	573	4	395	5	142	276	35.1	20		0				0													122.887	6.14437e+09			0.0227216
T2 J-C-PI.003 5	553	3	369	6	150	229	33.6	20		0				0													105.649	5.28243e+09			0.0195342
T2 J-C-Sybr.001 5	80	754	534	819	74.1	2	8.54	20	2404.55	120227656250	1.32417e+11	3.35284e+10	2611.84	130592109375	1.38003e+11	2.77274e+10	250819765625	2.70419e+11	6.12188e+10	47.9339	48.6925	1.24248	52.0661	51.3075	1.24248
T2 J-C-Sybr.002 5	65	908	746	892	125	0	n/a	20	3563.9	178195000000			3501.1	175055000000			353250000000			50.4444			49.5556
T2 J-C-Sybr.003 5	95	736	718	807	117	1	9.2	20	1976.55	9.88274e+10			2167.22	1.08361e+11			2.07188e+11			47.6993			52.3007
T4 J-A-PI.001 5	249	0	n/a	0	n/a	469	30.7	20						0													480.537	4.80537e+09	6.46901e+09	1.29116e+09	0.117935	0.158764	0.0316879
T4 J-A-PI.002 5	259	3	730	5	73.5	675	34.4	20						0													664.901	6.64901e+09			0.163182
T4 J-A-PI.003 5	239	0	n/a	1	83.3	745	34.2	20						0													795.264	7.95264e+09			0.195176
T4 J-A-Sybr.001 5	115	1169	608	891	75.4	5	10.7	20	2593.4	2.5934e+10	2.1005e+10	4.88996e+09	1976.66	1.97666e+10	1.9741e+10	2.46026e+09	4.57007e+10	4.07461e+10	6.85328e+09	56.7476	50.9744	4.37063	43.2524	49.0256	4.37063
T4 J-A-Sybr.002 5	87	489	840	570	128	2	10.1	20	1433.98	1.43398e+10			1671.51	1.67151e+10			3.10549e+10			46.1756			53.8244
T4 J-A-Sybr.003 5	58	517	1428	517	228	0	n/a	20	2274.13	2.27413e+10			2274.13	2.27413e+10			4.54826e+10			50			50
T4 J-C-PI.001 5	735	0	n/a	0	n/a	979	33	20						0													339.82	3.3982e+09	1.23034e+10	7.22562e+09	0.0330942	0.11982	0.0703685
T4 J-C-PI.002 5	517	0	n/a	36	67.8	2516	28.1	20						0													1241.58	1.24158e+10			0.120914
T4 J-C-PI.003 5	145	0	n/a	0	n/a	1199	33.4	20						0													2109.62	2.10962e+10			0.205451
T4 J-C-Sybr.001 5	86	1413	1302	1455	215	1	22.4	20	4191.76	4.19176e+10	4.66321e+10	5.5327e+09	4316.36	4.31636e+10	5.60505e+10	1.22016e+10	8.50812e+10	1.02683e+11	1.76609e+10	49.2678	45.8302	2.62732	50.7322	54.1698	2.62732
T4 J-C-Sybr.002 5	85	1452	1444	1751	233	0	n/a	20	4358.14	4.35814e+10			5255.57	52555750000			9.61371e+10			45.3325			54.6675
T4 J-C-Sybr.003 5	87	1855	989	2470	136	0	n/a	20	5439.73	5.43973e+10			7243.2	7.2432e+10			1.26829e+11			42.8902			57.1098
T6 J-A-PI.001 5	704	0	n/a	2	101	345	32.7	20						0													125.026	1.25026e+09	1.25348e+09	8.31684e+07	0.052182	0.0523163	0.0034712
T6 J-A-PI.002 5	769	0	n/a	18	101	409	28	20						0													135.691	1.35691e+09			0.0566332
T6 J-A-PI.003 5	834	1	170	133	74	377	31.7	20						0													115.326	1.15326e+09			0.0481338
T6 J-A-Sybr.001 5	497	955	1741	1243	327	14	10.3	20	490.23	4.9023e+09	9.37528e+09	4.41524e+09	638.069	6.38069e+09	1.45843e+10	9.06232e+09	1.1283e+10	2.39595e+10	1.34615e+10	43.4486	41.0398	3.4818	56.5514	58.9602	3.4818
T6 J-A-Sybr.002 5	331	1017	1473	1318	262	0	n/a	20	783.873	7.83873e+09			1015.88	1.01588e+10			1.79975e+10			43.5546			56.4454
T6 J-A-Sybr.003 5	165	995	1198	1760	160	51	10.1	20	1538.48	1.53848e+10			2721.33	2.72133e+10			4.25981e+10			36.1162			63.8838
T6 J-C-PI.001 5	648	5	376	8	117	1159	32.9	20						0													456.312	4.56312e+09	1.18228e+10	5.6299e+09	0.041012	0.10626	0.0506
T6 J-C-PI.002 5	246	0	n/a	0	n/a	1217	34.4	20						0													1262.14	1.26214e+10			0.113438
T6 J-C-PI.003 5	168	0	n/a	0	n/a	1204	35.5	20						0													1828.4	1.8284e+10			0.164331
T6 J-C-Sybr.001 5	252	2236	260	3344	43.9	0	n/a	20	2263.73	2.26373e+10	4.85448e+10	2.85547e+10	3385.47	3.38547e+10	6.27181e+10	2.74656e+10	5.6492e+10	1.11263e+11	5.58809e+10	40.0717	41.9595	3.59008	59.9283	58.0405	3.59008
T6 J-C-Sybr.002 5	144	1957	1381	3084	230	0	n/a	20	3467.22	3.46722e+10			5463.93	5.46393e+10			8.93115e+10			38.8217			61.1783
T6 J-C-Sybr.003 5	79	2735	440	3086	66.3	0	n/a	20	8832.49	8.83249e+10			9966.02	9.96602e+10			1.87985e+11			46.9851			53.0149
														0
T0 R-PI.001 9	242	0	n/a	0	n/a	211	22.2	20						0													134.621	6.73107e+09	6.91634e+09	5.28526e+08	0.0660326	0.0678501	0.00518491
T0 R-PI.002 9	300	0	n/a	0	n/a	248	27.7	20						0													127.637	6.38187e+09			0.0626068
T0 R-PI.003 9	184	0	n/a	1	31.7	182	28.8	20						0													152.722	7.63609e+09			0.0749109
T0 R-Sybr.001 9	341	662	782	666	90.1	0	n/a	20	299.744	1.49872e+10	4.59619e+10	3.00518e+10	301.555	1.50778e+10	5.59737e+10	4.21246e+10	3.0065e+10	1.01936e+11	7.21449e+10	49.8494	47.093	2.83204	50.1506	52.907	2.83204
T0 R-Sybr.002 9	58	651	1170	856	116	1	10.1	20	1733.01	8.66503e+10			2278.73	1.13937e+11			2.00587e+11			43.1984			56.8016
T0 R-Sybr.003 9	151	709	750	761	76.1	0	n/a	20	724.964	3.62482e+10			778.135	3.89068e+10			7.5155e+10			48.2313			51.7687
T2 R-A-PI.001 9	515	0	n/a	0	n/a	341	24.7	20						0													102.234	1.02234e+09	1.09108e+09	5.27484e+07	0.0453039	0.0483504	0.00233749
T2 R-A-PI.002 9	623	0	n/a	0	n/a	444	31.8	20						0													110.038	1.10038e+09			0.0487622
T2 R-A-PI.003 9	569	0	n/a	0	n/a	424	26.8	20						0													115.054	1.15054e+09			0.050985
T2 R-A-Sybr.001 9	141	283	1050	393	200	1	6.9	20	309.895	3.09895e+09	8.7209e+09	4.73485e+09	430.349	4.30349e+09	1.38453e+10	7.46992e+09	7.40244e+09	2.25662e+10	1.218e+10	41.8639	39.2116	2.26553	58.1361	60.7884	2.26553
T2 R-A-Sybr.002 9	70	380	1337	666	213	0	n/a	20	838.171	8.38171e+09			1469.01	1.46901e+10			2.30718e+10			36.3289			63.6711
T2 R-A-Sybr.003 9	55	523	1297	803	172	0	n/a	20	1468.2	1.4682e+10			2254.24	22542400000			3.72244e+10			39.4419			60.5581
T2 R-C-PI.001 9	168	0	n/a	0	n/a	721	28.9	20						0													662.633	6.62633e+09	7.70264e+09	1.71405e+09	0.170967	0.198737	0.0442244
T2 R-C-PI.002 9	126	0	n/a	0	n/a	826	28.8	20						0													1012.18	1.01218e+10			0.261154
T2 R-C-PI.003 9	210	0	n/a	0	n/a	865	27.4	20						0													635.981	6.35981e+09			0.164091
T2 R-C-Sybr.001 9	162	763	444	1164	53	0	n/a	20	727.205	7.27205e+09	1.55042e+10	6.08059e+09	1109.39	1.10939e+10	2.32537e+10	1.03317e+10	1.8366e+10	3.87579e+10	1.62468e+10	39.5952	40.3201	2.68011	60.4048	59.6799	2.68011
T2 R-C-Sybr.002 9	59	832	401	1389	55.7	0	n/a	20	2177.3	2.1773e+10			3634.94	3.63494e+10			5.81224e+10			37.4606			62.5394
T2 R-C-Sybr.003 9	99	1120	501	1431	57.4	0	n/a	20	1746.75	1.74675e+10			2231.78	2.23178e+10			3.97853e+10			43.9044			56.0956
T4 R-A-PI.001 9	669	0	n/a	1	61.5	581	27.2	20						0													134.09	1.3409e+09	1.13662e+09	1.81434e+08	0.0373112	0.0316269	0.00504848
T4 R-A-PI.002 9	995	0	n/a	0	n/a	580	26.7	20						0													90.002	9.0002e+08			0.0250434
T4 R-A-PI.003 9	918	0	n/a	0	n/a	695	29.6	20						0													116.893	1.16893e+09			0.032526
T4 R-A-Sybr.001 9	191	583	1182	818	154	0	n/a	20	471.284	4.71284e+09	1.3847e+10	1.02917e+10	661.252	6.61252e+09	2.20913e+10	1.93729e+10	1.13254e+10	3.59383e+10	2.96441e+10	41.6131	41.1964	3.79106	58.3869	58.8036	3.79106
T4 R-A-Sybr.002 9	142	791	555	943	73.3	0	n/a	20	860.073	8.60073e+09			1025.35	1.02535e+10			1.88542e+10			45.6171			54.3829
T4 R-A-Sybr.003 9	39	713	565	1248	75.2	0	n/a	20	2822.75	2.82275e+10			4940.8	49408000000			7.76355e+10			36.359			63.641
T4 R-C-PI.001 9	528	0	n/a	0	n/a	972	30.1	20						0													284.236	2.84236e+09	2.83243e+09	1.35886e+07	0.0517711	0.0515902	0.000247504
T4 R-C-PI.002 9	652	0	n/a	0	n/a	1200	28.7	20						0													284.172	2.84172e+09			0.0517593
T4 R-C-PI.003 9	590	0	n/a	0	n/a	1075	30	20						0													281.322	2.81322e+09			0.0512403
T4 R-C-Sybr.001 9	159	1704	545	1382	66.3	0	n/a	20	1654.7	1.6547e+10	2.63746e+10	8.62167e+09	1342.02	1.34202e+10	2.85279e+10	1.06865e+10	2.99672e+10	5.49025e+10	1.84364e+10	55.2171	49.0556	5.84673	44.7829	50.9444	5.84673
T4 R-C-Sybr.002 9	64	1556	602	1510	72.6	0	n/a	20	3753.85	37538500000			3642.88	36428750000			73967250000			50.7502			49.2498
T4 R-C-Sybr.003 9	97	1573	519	2245	54.1	0	n/a	20	2503.83	2.50383e+10			3573.48	3.57348e+10			6.07731e+10			41.1996			58.8004
T6 R-A-PI.001 9	140	0	n/a	0	n/a	513	26.1	20						0													565.766	5.65766e+09	6.26202e+09	9.99447e+08	0.146745	0.16242	0.025923
T6 R-A-PI.002 9	94	0	n/a	0	n/a	467	26.9	20						0													767.072	7.67072e+09			0.198959
T6 R-A-PI.003 9	187	0	n/a	0	n/a	661	26.6	20						0													545.767	5.45767e+09			0.141558
T6 R-A-Sybr.001 9	161	1130	1182	1727	165	0	n/a	20	1083.68	1.08368e+10	1.20345e+10	1.17546e+09	1656.2	1.6562e+10	2.65198e+10	7.33671e+09	2.73988e+10	3.85544e+10	7.98599e+09	39.552	32.3433	5.74888	60.448	67.6567	5.74888
T6 R-A-Sybr.002 9	111	980	1253	2083	176	0	n/a	20	1363.17	1.36317e+10			2897.43	2.89743e+10			4.26061e+10			31.9948			68.0052
T6 R-A-Sybr.003 9	84	633	1055	1851	174	0	n/a	20	1163.51	1.16351e+10			3402.31	3.40231e+10			4.56583e+10			25.4831			74.5169
T6 R-C-PI.001 9	425	0	n/a	0	n/a	1384	26.6	20						0													502.799	5.02799e+09	1.16119e+10	5.14815e+09	0.143332	0.331018	0.146757
T6 R-C-PI.002 9	149	0	n/a	0	n/a	1698	29.3	20						0													1759.54	1.75954e+10			0.501588
T6 R-C-PI.003 9	210	0	n/a	0	n/a	1661	28.6	20						0													1221.23	1.22123e+10			0.348134
T6 R-C-Sybr.001 9	174	1002	1135	1191	176	0	n/a	20	889.131	8.89131e+09	1.61526e+10	6.23455e+09	1056.84	1.05684e+10	1.89268e+10	7.91869e+09	1.94597e+10	3.50794e+10	1.4126e+10	45.6908	46.2498	1.3668	54.3092	53.7502	1.3668
T6 R-C-Sybr.002 9	130	1301	1152	1402	164	0	n/a	20	1545.19	1.54519e+10			1665.14	1.66514e+10			3.21033e+10			48.1317			51.8683
T6 R-C-Sybr.003 9	55	859	1433	1053	254	2	7.17	20	2411.45	2.41145e+10			2956.06	2.95606e+10			5.36751e+10			44.9268			55.0732
														0
														0
														0
T0 H-PI.001 10	503	0	n/a	0	n/a	1692	38.4	20						0													956.728	9.56728e+09	1.05395e+10	3.31439e+09	0.0609009	0.0670893	0.0210978
T0 H-PI.002 10	319	0	n/a	0	n/a	1682	40.5	20						0													1499.66	1.49966e+10			0.0954611
T0 H-PI.003 10	687	0	n/a	0	n/a	1704	42.3	20						0													705.454	7.05454e+09			0.044906
T0 H-Sybr.001 10	95	513	930	1394	173	0	n/a	20	1535.85	1.53585e+10	4.69633e+10	3.07067e+10	4173.45	4.17345e+10	1.10133e+11	6.67321e+10	5.7093e+10	1.57096e+11	9.74385e+10	26.9009	29.0344	1.56726	73.0991	70.9656	1.56726		0	0
T0 H-Sybr.002 10	22	685	334	1552	53.4	0	n/a	20	8855.72	8.85572e+10			20064.4	2.00644e+11			2.89201e+11			30.6214			69.3786				0	0
T0 H-Sybr.003 10	57	741	212	1764	32.1	0	n/a	20	3697.43	3.69743e+10			8801.97	8.80197e+10			1.24994e+11			29.5808			70.4192				0	0
T2 H-A-PI.001 10	262	0	n/a	0	n/a	2329	33.2	20						0													2528.28	2.52828e+10	2.62471e+10	5.1008e+09	0.100814	0.104659	0.0203393
T2 H-A-PI.002 10	221	0	n/a	0	n/a	2558	35.4	20						0													3292.03	3.29203e+10			0.131269
T2 H-A-PI.003 10	303	0	n/a	0	n/a	2188	33	20						0													2053.81	2.05381e+10			0.0818951
T2 H-A-Sybr.001 10	113	2160	662	6453	83.3	0	n/a	20	5436.65	5.43665e+10	6.75874e+10	1.00853e+10	16242	1.6242e+11	1.83198e+11	4.05095e+10	2.16786e+11	2.50786e+11	4.79908e+10	25.0784	27.2956	3.37849	74.9216	72.7044	3.37849		0	0
T2 H-A-Sybr.002 10	106	2938	602	8938	60.2	1	6.18	20	7883.19	7.88319e+10			23982.3	2.39823e+11			3.18655e+11			24.739			75.261				2.68318	2.68318e+07
T2 H-A-Sybr.003 10	120	2935	1129	6217	149	0	n/a	20	6956.38	6.95638e+10			14735.2	1.47352e+11			2.16916e+11			32.0695			67.9305				0	0
T2 H-C-PI.001 10	486	0	n/a	0	n/a	1682	33.8	20						0													984.342	9.84342e+09	1.03836e+10	4.3847e+08	0.0966303	0.101933	0.00430435
T2 H-C-PI.002 10	483	0	n/a	0	n/a	1854	35.4	20						0													1091.74	1.09174e+10			0.107173
T2 H-C-PI.003 10	490	0	n/a	1	144	1790	35.2	20						0													1038.99	1.03899e+10			0.101995
T2 H-C-Sybr.001 10	342	3121	622	6419	80.8	0	n/a	20	2595.52	2.59552e+10	3.03134e+10	1.1334e+10	5338.23	5.33823e+10	7.15533e+10	3.17331e+10	7.93375e+10	1.01867e+11	4.29835e+10	32.7149	30.2668	1.83465	67.2851	69.7332	1.83465
T2 H-C-Sybr.002 10	124	1999	1093	5065	176	1	9.45	20	4585.08	4.58508e+10			11617.5	1.16175e+11			1.62026e+11			28.2984			71.7016
T2 H-C-Sybr.003 10	422	2839	545	6692	65.8	0	n/a	20	1913.41	1.91341e+10			4510.24	4.51024e+10			6.42365e+10			29.787			70.213
T4 H-A-PI.001 10	1058	0	n/a	0	n/a	2019	32.4	20						0													542.759	5.42759e+09	6.1066e+09	8.61412e+08	0.0189407	0.0213103	0.00300608
T4 H-A-PI.002 10	914	0	n/a	0	n/a	2353	34.5	20						0													732.204	7.32204e+09			0.0255518
T4 H-A-PI.003 10	1059	0	n/a	0	n/a	2074	36.1	20						0													557.018	5.57018e+09			0.0194383
T4 H-A-Sybr.001 10	377	2423	227	7575	24.9	0	n/a	20	1827.97	1.82797e+10	6.88905e+10	2.12956e+10	5714.75	5.71475e+10	2.17666e+11	8.27301e+10	7.54272e+10	2.86557e+11	1.04026e+11	24.2348	24.5826	1.22951	75.7652	75.5333	1.22951		0
T4 H-A-Sybr.002 10	55	1744	1094	5809	116	0	n/a	20	9018.62	9.01862e+10			30039.6	3.00396e+11			3.90583e+11			23.0902			76.9098				0
T4 H-A-Sybr.003 10	79	1322	1008	3748	120	0	n/a	20	4759.49	4.75949e+10			13493.6	1.34936e+11			1.82531e+11			26.075			73.925				0
T4 H-C-PI.001 10	631	0	n/a	0	n/a	940	32.8	20						0													423.696	4.23696e+09	5.0446e+09	5.8215e+08	0.0336421	0.0400548	0.00462235
T4 H-C-PI.002 10	588	0	n/a	0	n/a	1155	31.4	20						0													558.677	5.58677e+09			0.0443598
T4 H-C-PI.003 10	609	0	n/a	0	n/a	1137	34.1	20						0													531.006	5.31006e+09			0.0421626
T4 H-C-Sybr.001 10	433	2411	447	5548	57.5	0	n/a	20	1583.67	1.58367e+10	3.44145e+10	1.40367e+10	3644.22	3.64422e+10	9.15278e+10	4.22585e+10	5.22789e+10	1.25942e+11	5.62875e+10	30.2928	28.0617	1.65293	69.7072	71.9383	1.65293
T4 H-C-Sybr.002 10	115	2012	715	5626	108	0	n/a	20	4976.07	4.97607e+10			13914.2	1.39142e+11			1.88903e+11			26.342			73.658
T4 H-C-Sybr.003 10	182	2409	768	6335	119	0	n/a	20	3764.62	3.76462e+10			9899.91	9.89991e+10			1.36645e+11			27.5503			72.4497
T6 H-A-PI.001 10	518	0	n/a	0	n/a	1904	32.9	20						0													1045.43	1.04543e+10	1.0774e+10	2.13011e+09	0.0613915	0.0632691	0.0125088
T6 H-A-PI.002 10	431	0	n/a	0	n/a	2050	33.1	20						0													1352.8	1.3528e+10			0.0794415
T6 H-A-PI.003 10	605	0	n/a	0	n/a	1774	33.9	20						0													833.978	8.33978e+09			0.0489744
T6 H-A-Sybr.001 10	368	1933	478	7412	42.4	0	n/a	20	1493.96	1.49396e+10	3.88145e+10	2.0482e+10	5728.54	5.72854e+10	1.31474e+11	7.30219e+10	7.2225e+10	1.70289e+11	9.32802e+10	20.6849	22.7414	2.07062	79.3151	77.2586	2.07062
T6 H-A-Sybr.002 10	99	2261	265	8033	30.8	0	n/a	20	6495.63	6.49563e+10			23078	2.3078e+11			2.95737e+11			21.9643			78.0357
T6 H-A-Sybr.003 10	180	2313	971	6731	107	2	7.61	20	3654.76	3.65476e+10			10635.6	1.06356e+11			1.42904e+11			25.575			74.425
T6 H-C-PI.001 10	237	0	n/a	0	n/a	1667	37.3	20						0													2000.52	2.00052e+10	2.40924e+10	2.98443e+09	0.0330608	0.0398154	0.00493209
T6 H-C-PI.002 10	221	0	n/a	0	n/a	1960	39.4	20						0													2522.43	2.52243e+10			0.041686
T6 H-C-PI.003 10	253	0	n/a	0	n/a	2406	38.4	20						0													2704.78	2.70478e+10			0.0446993
T6 H-C-Sybr.001 10	43	2152	547	4972	71.2	1	6.41	20	14234.1	1.42341e+11	1.83572e+11	3.49397e+10	32886.6	3.28866e+11	4.21532e+11	6.66029e+10	4.71207e+11	6.05104e+11	9.96851e+10	30.2077	30.2566	1.4602	69.7923	69.7434	1.4602
T6 H-C-Sybr.002 10	36	2883	531	6107	55	0	n/a	20	22777.1	2.27771e+11			48248.3	4.82483e+11			7.10253e+11			32.069			67.931
T6 H-C-Sybr.003 10	50	3175	270	7968	30.4	0	n/a	20	18060.5	1.80605e+11			45324.8	4.53248e+11			6.33853e+11			28.4932			71.5068
T0 J-PI.001 10	519	0	n/a	0	n/a	878	31.7	20						0													481.153	4.81153e+09	4.95016e+09	2.48135e+08	0.0389263	0.0400478	0.00200746
T0 J-PI.002 10	489	0	n/a	0	n/a	911	32.5	20						0													529.866	5.29866e+09			0.0428672
T0 J-PI.003 10	549	0	n/a	0	n/a	915	32.3	20						0													474.029	4.74029e+09			0.0383499
T0 J-Sybr.001 10	88	1590	541	2076	97.5	0	n/a	20	5138.91	5.13891e+10	5.73912e+10	1.51052e+10	6709.66	6.70966e+10	6.62151e+10	1.32133e+10	1.18486e+11	1.23606e+11	2.7931e+10	43.3715	46.136	2.22333	56.6285	53.864	2.22333
T0 J-Sybr.002 10	63	1731	373	1815	89.1	0	n/a	20	7814.71	7.81471e+10			8193.93	8.19393e+10			1.60086e+11			48.8156			51.1844
T0 J-Sybr.003 10	113	1694	467	1971	104	0	n/a	20	4263.74	4.26374e+10			4960.94	4.96094e+10			9.22469e+10			46.221			53.779
T2 J-A-PI.001 10	448	0	n/a	0	n/a	215	20.8	20						0													136.495	1.36495e+09	2.09805e+09	9.35154e+08	0.0931574	0.143192	0.063824
T2 J-A-PI.002 10	352	0	n/a	0	n/a	423	21.8	20						0													341.786	3.41786e+09			0.233268
T2 J-A-PI.003 10	924	0	n/a	0	n/a	491	24.1	20						0													151.135	1.51135e+09			0.103149
T2 J-A-Sybr.001 10	359	490	517	852	80.5	1	7.95	20	388.202	3.88202e+09	6.33416e+09	1.80805e+09	674.996	6.74996e+09	8.31792e+09	1.2074e+09	1.0632e+10	1.46521e+10	3.01025e+09	36.5127	42.3975	4.17848	63.4873	57.6025	4.17848
T2 J-A-Sybr.002 10	165	475	520	562	95.3	0	n/a	20	818.777	8.18777e+09			968.743	9.68743e+09			1.78752e+10			45.8052			54.1948
T2 J-A-Sybr.003 10	176	429	290	527	70.8	0	n/a	20	693.267	6.93267e+09			851.636	8.51636e+09			1.5449e+10			44.8745			55.1255
T2 J-C-PI.001 10	966	0	n/a	0	n/a	856	24.8	20						0													252.03	2.5203e+09	2.47795e+09	2.32592e+08	0.0195284	0.0192002	0.00180222
T2 J-C-PI.002 10	985	0	n/a	0	n/a	753	30	20						0													217.428	2.17428e+09			0.0168472
T2 J-C-PI.003 10	976	0	n/a	0	n/a	940	25.5	20						0													273.927	2.73927e+09			0.021225
T2 J-C-Sybr.001 10	19.5	638	318	300	71.5	0	n/a	20	9305.55	9.30555e+10	8.63582e+10	1.70419e+10	4375.65	4.37565e+10	4.27002e+10	7.13328e+09	1.36812e+11	1.29058e+11	2.40967e+10	68.0171	66.7517	1.12614	31.9829	33.2483	1.12614
T2 J-C-Sybr.002 10	22	487	631	259	112	0	n/a	20	6295.97	6.29597e+10			3348.37	3.34837e+10			9.64434e+10			65.2815			34.7185
T2 J-C-Sybr.003 10	17	616	301	304	63.8	0	n/a	20	10305.9	1.03059e+11			5086.05	5.08605e+10			1.5392e+11			66.9565			33.0435
T4 J-A-PI.001 10	393	0	n/a	0	n/a	433	24.1	20						0													313.366	3.13366e+09	3.39895e+09	1.9898e+08	0.0812128	0.0880881	0.00515684
T4 J-A-PI.002 10	305	0	n/a	0	n/a	370	28.2	20						0													345.031	3.45031e+09			0.0894193
T4 J-A-PI.003 10	481	0	n/a	0	n/a	611	22.8	20						0													361.287	3.61287e+09			0.0936322
T4 J-A-Sybr.001 10	393	725	305	633	58.3	0	n/a	20	524.689	5.24689e+09	1.77195e+10	1.18876e+10	458.107	4.58107e+09	2.08662e+10	1.15492e+10	9.82796e+09	3.85857e+10	2.21787e+10	53.3873	46.6425	9.15602	46.6127	53.3575	9.15602
T4 J-A-Sybr.002 10	69	818	298	730	70.2	0	n/a	20	3371.79	3.37179e+10			3009.05	3.00905e+10			6.38084e+10			52.8424			47.1576
T4 J-A-Sybr.003 10	105	524	189	1031	39.4	0	n/a	20	1419.38	1.41938e+10			2792.71	2.79271e+10			4.21209e+10			33.6977			66.3023
T4 J-C-PI.001 10	372	0	n/a	0	n/a	745	21.4	20						0													569.599	5.69599e+09	6.3174e+09	9.7109e+08	0.147096	0.163144	0.0250779
T4 J-C-PI.002 10	391	0	n/a	0	n/a	1057	20.1	20						0													768.873	7.68873e+09			0.198558
T4 J-C-PI.003 10	353	0	n/a	0	n/a	691	23.5	20						0													556.749	5.56749e+09			0.143778
T4 J-C-Sybr.001 10	311	163	435	705	68.6	1	5.99	20	149.068	1.49068e+09	1.58917e+10	1.28276e+10	644.74	6.4474e+09	2.28311e+10	1.39309e+10	7.93808e+09	3.87228e+10	2.67444e+10	18.7788	33.9991	11.0418	81.2212	66.0009	11.0418
T4 J-C-Sybr.002 10	46	528	449	655	83	2	7.44	20	3264.62	3.26462e+10			4049.86	4.04986e+10			7.31447e+10			44.6323			55.3677
T4 J-C-Sybr.003 10	125	595	315	947	67.6	2	6.83	20	1353.83	1.35383e+10			2154.75	2.15475e+10			3.50857e+10			38.5863			61.4137
T6 J-A-PI.001 10	467	0	n/a	0	n/a	369	28	20						0													224.732	2.24732e+09	2.40236e+09	2.23351e+08	0.0991518	0.105992	0.00985424
T6 J-A-PI.002 10	505	0	n/a	0	n/a	398	30.5	20						0													224.155	2.24155e+09			0.098897
T6 J-A-PI.003 10	429	0	n/a	0	n/a	410	25.6	20						0													271.821	2.71821e+09			0.119927
T6 J-A-Sybr.001 10	319	508	398	584	70	1	8.86	20	452.928	4.52928e+09	8.16941e+09	2.59005e+09	520.689	5.20689e+09	1.44961e+10	7.02427e+09	9.73617e+09	2.26655e+10	9.55496e+09	46.5201	38.5889	6.06604	53.4799	61.4111	6.06604
T6 J-A-Sybr.002 10	152	515	922	860	102	0	n/a	20	963.651	9.63651e+09			1609.2	1.6092e+10			2.57285e+10			37.4545			62.5455
T6 J-A-Sybr.003 10	121	440	1002	944	61.7	0	n/a	20	1034.25	1.03425e+10			2218.93	2.21893e+10			3.25317e+10			31.7919			68.2081
T6 J-C-PI.001 10	1310	0	n/a	0	n/a	374	29.1	20						0													81.2001	8.12001e+08	1.39815e+09	4.47532e+08	0.0473653	0.0815566	0.0261053
T6 J-C-PI.002 10	508	0	n/a	0	n/a	339	29.6	20						0													189.798	1.89798e+09			0.110712
T6 J-C-PI.003 10	661	0	n/a	0	n/a	345	32.2	20						0													148.448	1.48448e+09			0.086592
T6 J-C-Sybr.001 10	404	663	480	639	102	0	n/a	20	466.754	4.66754e+09	8.38627e+09	3.43936e+09	449.858	4.49858e+09	8.75709e+09	4.01066e+09	9.16612e+09	1.71434e+10	7.44961e+09	50.9217	49.4651	1.26346	49.0783	50.5349	1.26346
T6 J-C-Sybr.002 10	281	744	358	755	81.7	0	n/a	20	753.048	7.53048e+09			764.182	7.64182e+09			1.51723e+10			49.6331			50.3669
T6 J-C-Sybr.003 10	158	720	325	785	72.6	0	n/a	20	1296.08	1.29608e+10			1413.09	1.41309e+10			2.70917e+10			47.8405			52.1595
														0
														0
T0 H-PI.001 11	205	0	n/a	0	n/a	1583	27.1	20						0													2594.11	2.59411e+10	2.92979e+10	6.46835e+09	0.20599	0.232645	0.0513631
T0 H-PI.002 11	152	0	n/a	0	n/a	1735	29.5	20						0													3834.57	3.83457e+10			0.304491
T0 H-PI.003 11	258	0	n/a	0	n/a	1813	28	20						0													2360.69	2.36069e+10			0.187455
T0 H-Sybr.001 11	282	1660	415	4836	45	0	n/a	20	1977.52	1.97752e+10	3.06709e+10	8.54847e+09	5761.01	5.76101e+10	9.52629e+10	2.91385e+10	7.73852e+10	1.25934e+11	3.76841e+10	25.5542	24.551	0.709728	74.4458	75.449	0.709728
T0 H-Sybr.002 11	108	1307	856	4134	101	0	n/a	20	4065.49	4.06549e+10			12859	1.2859e+11			1.69245e+11			24.0213			75.9787
T0 H-Sybr.003 11	152	1429	759	4506	89.3	0	n/a	20	3158.27	3.15827e+10			9958.84	9.95884e+10			1.31171e+11			24.0775			75.9225
T2 H-A-PI.001 11	504	0	n/a	0	n/a	1670	30.1	20						0													1113.13	1.11313e+10	1.33206e+10	2.79959e+09	0.0962291	0.115155	0.0242021
T2 H-A-PI.002 11	606	0	n/a	0	n/a	2085	28.5	20						0													1155.83	1.15583e+10			0.0999203
T2 H-A-PI.003 11	403	0	n/a	0	n/a	2072	26.9	20						0													1727.21	1.72721e+10			0.149316
T2 H-A-Sybr.001 11	337	1169	930	3214	115	0	n/a	20	1165.32	1.16532e+10	3.01781e+10	2.17379e+10	3203.89	3.20389e+10	8.54973e+10	6.97089e+10	4.36921e+10	1.15675e+11	9.14019e+10	26.6712	27.4928	2.59504	73.3288	72.5072	2.59504
T2 H-A-Sybr.002 11	279	1511	997	3363	117	0	n/a	20	1819.37	1.81937e+10			4049.34	4.04934e+10			5.86871e+10			31.0012			68.9988
T2 H-A-Sybr.003 11	308	5564	877	16866	112	0	n/a	20	6068.73	6.06873e+10			18396	1.8396e+11			2.44647e+11			24.8061			75.1939
T2 H-C-PI.001 11	940	0	n/a	0	n/a	1947	29.7	20						0													695.824	6.95824e+09	8.71491e+09	1.34994e+09	0.0451627	0.0565645	0.00876184
T2 H-C-PI.002 11	896	0	n/a	0	n/a	2386	29.5	20						0													894.589	8.94589e+09			0.0580637
T2 H-C-PI.003 11	848	0	n/a	0	n/a	2585	30.2	20						0													1024.06	1.02406e+10			0.0664671
T2 H-C-Sybr.001 11	268	1502	603	3378	64.9	0	n/a	20	1882.77	1.88277e+10	4.32589e+10	1.83862e+10	4234.34	4.23434e+10	1.10812e+11	5.53568e+10	6.11711e+10	1.5407e+11	7.35733e+10	30.7787	28.95	1.97592	69.2213	71.05	1.97592
T2 H-C-Sybr.002 11	104	1956	259	5508	37.1	0	n/a	20	6318.25	6.31825e+10			17791.9	1.77919e+11			2.41101e+11			26.2058			73.7942
T2 H-C-Sybr.003 11	128	1820	1056	4274	125	1	6.95	20	4776.64	4.77664e+10			11217.2	1.12172e+11			1.59939e+11			29.8654			70.1346
T4 H-A-PI.001 11	390	0	n/a	0	n/a	1347	31.9	20						0													1160.28	1.16028e+10	1.35699e+10	1.88499e+09	0.101761	0.119013	0.0165321
T4 H-A-PI.002 11	433	0	n/a	0	n/a	1675	28.1	20						0													1299.54	1.29954e+10			0.113974
T4 H-A-PI.003 11	348	0	n/a	0	n/a	1669	28.4	20						0													1611.16	1.61116e+10			0.141304
T4 H-A-Sybr.001 11	103	460	2326	910	351	2	8.99	20	1500.31	1.50031e+10	3.12516e+10	7.61449e+08	2968.01	2.96801e+10	8.27688e+10	1.28422e+10	4.46832e+10	1.1402e+11	1.36037e+10	33.5766	27.7238	2.63988	66.4234	72.2762	2.63988
T4 H-A-Sybr.002 11	92	835	1725	1915	197	0	n/a	20	3049.02	3.04902e+10			6992.66	6.99266e+10			1.00417e+11			30.3636			69.6364
T4 H-A-Sybr.003 11	102	972	1333	2903	149	0	n/a	20	3201.31	3.20131e+10			9561.11	9.56111e+10			1.27624e+11			25.0839			74.9161
T4 H-C-PI.001 11	360	0	n/a	0	n/a	1439	29.1	20						0													1342.83	1.34283e+10	1.44514e+10	2.01738e+09	0.240349	0.258662	0.0361087
T4 H-C-PI.002 11	320	0	n/a	0	n/a	1645	29.1	20						0													1726.94	1.72694e+10			0.309101
T4 H-C-PI.003 11	400	0	n/a	0	n/a	1507	28.2	20						0													1265.65	1.26565e+10			0.226536
T4 H-C-Sybr.001 11	393	1668	257	4690	26.2	0	n/a	20	1425.82	1.42582e+10	1.67391e+10	2.57128e+09	4009.05	4.00905e+10	3.91307e+10	2.41564e+09	5.43487e+10	5.58698e+10	4.33381e+09	26.2347	29.8387	2.7282	73.7653	70.1613	2.7282
T4 H-C-Sybr.002 11	303	1414	1193	3230	151	0	n/a	20	1567.72	1.56772e+10			3581.14	3.58114e+10			5.14886e+10			30.4479			69.5521
T4 H-C-Sybr.003 11	214	1292	1089	2643	142	0	n/a	20	2028.2	2.0282e+10			4149.01	4.14901e+10			6.17721e+10			32.8335			67.1665
T6 H-A-PI.001 11	331	0	n/a	0	n/a	1721	29.6	20						0													1746.68	1.74668e+10	1.77969e+10	1.67457e+09	0.145717	0.148471	0.0139701
T6 H-A-PI.002 11	308	0	n/a	0	n/a	1833	28.4	20						0													1999.28	1.99928e+10			0.16679
T6 H-A-PI.003 11	353	0	n/a	0	n/a	1674	25.2	20						0													1593.1	1.5931e+10			0.132904
T6 H-A-Sybr.001 11	300	1076	997	2683	131	0	n/a	20	1204.9	1.2049e+10	3.29353e+10	1.63494e+10	3004.42	3.00442e+10	8.69325e+10	4.71713e+10	4.20932e+10	1.19868e+11	6.34523e+10	28.6246	27.9759	1.18733	71.3754	72.0241	1.18733
T6 H-A-Sybr.002 11	149	1543	577	3779	66.4	0	n/a	20	3478.89	3.47889e+10			8520.24	8.52024e+10			1.19991e+11			28.9929			71.0071
T6 H-A-Sybr.003 11	98	1516	445	4246	39.8	0	n/a	20	5196.78	5.19678e+10			14555.1	1.45551e+11			1.97519e+11			26.3103			73.6897
T6 H-C-PI.001 11	505	0	n/a	0	n/a	1311	28.5	20						0													872.113	8.72113e+09	9.54852e+09	1.14398e+09	0.0597438	0.0654118	0.00783683
T6 H-C-PI.002 11	593	0	n/a	0	n/a	1546	30.8	20						0													875.822	8.75822e+09			0.0599979
T6 H-C-PI.003 11	423	0	n/a	0	n/a	1406	31.9	20						0													1116.62	1.11662e+10			0.0764938
T6 H-C-Sybr.001 11	261	1234	1106	3070	140	0	n/a	20	1588.31	1.58831e+10	4.11082e+10	1.83644e+10	3951.47	3.95147e+10	1.04867e+11	4.8058e+10	5.53979e+10	1.45976e+11	6.64128e+10	28.671	28.3092	0.392959	71.329	71.6908	0.392959
T6 H-C-Sybr.002 11	98	1411	728	3541	77.5	1	8.96	20	4836.84	4.83684e+10			12138.4	1.21384e+11			1.69752e+11			28.4935			71.5065
T6 H-C-Sybr.003 11	77	1354	841	3523	85.1	0	n/a	20	5907.3	5.9073e+10			15370.3	1.53703e+11			2.12776e+11			27.763			72.237
R-PI.001 T0 12	671	0	n/a	0	n/a	786	32	20						0													429.821	4.29821e+09	5.2108e+09	6.6519e+08	0.0812915	0.0985514	0.0125807
R-PI.002 T0 12	600	0	n/a	0	n/a	959	29.9	20						0													586.482	5.86482e+09			0.110921
R-PI.003 T0 12	742	0	n/a	0	n/a	1106	30	20						0													546.938	5.46938e+09			0.103442
R-Sybr.001 T0 12	74.5	369	1511	575	291	0	n/a	20	1817.43	1.81743e+10	1.86116e+10	3.30324e+09	2832.04	2.83204e+10	3.42623e+10	4.74799e+09	4.64946e+10	5.2874e+10	7.11323e+09	39.089	35.1653	3.80828	60.911	64.8347	3.80828
R-Sybr.002 T0 12	61	380	1040	664	198	0	n/a	20	2285.81	2.28581e+10			3994.16	3.99416e+10			6.27997e+10			36.3985			63.6015
R-Sybr.003 T0 12	88	355	1322	828	208	1	6.87	20	1480.24	1.48024e+10			3452.51	3.45251e+10			4.93275e+10			30.0085			69.9915
R-A-PI.001 T2 12	1366	0	n/a	0	n/a	621	27	20	0				0	0													166.812	1.66812e+09	2.96946e+09	9.37512e+08	0.0638842	0.113722	0.035904
R-A-PI.002 T2 12	667	0	n/a	0	n/a	698	27.1	20	0				0	0													383.987	3.83987e+09			0.147056
R-A-PI.003 T2 12	764	0	n/a	0	n/a	708	28.1	20	0				0	0													340.038	3.40038e+09			0.130225
R-A-Sybr.001 T2 12	441	900	1742	1206	279	0	n/a	20	748.844	7.48844e+09	1.29384e+10	4.97636e+09	1003.45	1.00345e+10	1.31732e+10	2.70555e+09	1.75229e+10	2.61117e+10	7.67682e+09	42.735	48.2036	4.59818	57.265	51.7964	4.59818
R-A-Sybr.002 T2 12	381	1226	1150	1334	190	0	n/a	20	1180.74	1.18074e+10			1284.75	1.28475e+10			2.46548e+10			47.8906			52.1094
R-A-Sybr.003 T2 12	219	1165	1509	993	315	0	n/a	20	1951.95	1.95195e+10			1663.77	1.66377e+10			3.61572e+10			53.9852			46.0148
R-C-PI.001 T2 12	630	0	n/a	0	n/a	463	25.7	20	0				0	0													269.667	2.69667e+09	2.81661e+09	5.65558e+08	0.180456	0.188482	0.037846
R-C-PI.002 T2 12	510	0	n/a	1	42.5	495	28.3	20	0				0.719477	7.19477e+06													356.141	3.56141e+09			0.238322
R-C-PI.003 T2 12	745	0	n/a	0	n/a	445	31.2	20	0				0	0													219.175	2.19175e+09			0.146667
R-C-Sybr.001 T2 12	387	745	1277	772	250	1	7.06	20	706.37	7.0637e+09	7.01089e+09	4.64449e+08	731.97	7.3197e+09	7.93278e+09	6.0938e+08	1.43834e+10	1.49437e+10	9.75297e+08	49.1101	46.9349	1.57896	50.8899	53.0651	1.57896
R-C-Sybr.002 T2 12	478	836	1143	1005	235	0	n/a	20	641.75	6.4175e+09			771.481	7.71481e+09			1.41323e+10			45.4101			54.5899
R-C-Sybr.003 T2 12	569	1171	468	1359	70.5	0	n/a	20	755.148	7.55148e+09			876.384	8.76384e+09			1.63153e+10			46.2846			53.7154
R-A-PI.001 T4 12	762	0	n/a	0	n/a	690	29.3	20	0				0	0													332.262	3.32262e+09	3.78818e+09	5.16269e+08	0.0515898	0.0588184	0.00801602
R-A-PI.002 T4 12	630	0	n/a	0	n/a	774	26.3	20	0				0	0													450.804	4.50804e+09			0.0699955
R-A-PI.003 T4 12	894	0	n/a	0	n/a	861	26.6	20	0				0	0													353.389	3.53389e+09			0.05487
R-A-Sybr.001 T4 12	157.5	1340	1319	1604	250	0	n/a	20	3121.85	3.12185e+10	3.04889e+10	5.16193e+08	3736.9	3.7369e+10	3.39158e+10	2.59716e+09	6.85874e+10	6.44047e+10	3.08207e+09	45.5163	47.4105	1.51204	54.4837	52.5895	1.51204
R-A-Sybr.002 T4 12	162	1329	1209	1469	235	0	n/a	20	3010.21	3.01021e+10			3327.32	3.32732e+10			6.33753e+10			47.4982			52.5018
R-A-Sybr.003 T4 12	153	1257	2014	1297	428	0	n/a	20	3014.61	3.01461e+10			3110.54	3.11054e+10			6.12515e+10			49.2169			50.7831
R-C-PI.001 T4 12	777	0	n/a	0	n/a	479	24.2	20	0				0	0													226.205	2.26205e+09	2.82413e+09	8.33817e+08	0.1377	0.171916	0.0507577
R-C-PI.002 T4 12	550	0	n/a	0	n/a	600	25.8	20	0				0	0													400.291	4.00291e+09			0.243673
R-C-PI.003 T4 12	1004	0	n/a	0	n/a	604	26	20	0				0	0													220.745	2.20745e+09			0.134376
R-C-Sybr.001 T4 12	550	931	676	1312	113	0	n/a	20	621.118	6.21118e+09	7.10583e+09	9.00324e+08	875.303	8.75303e+09	9.32156e+09	4.14081e+08	1.49642e+10	1.64274e+10	1.27194e+09	41.5069	43.1021	2.15868	58.4931	56.8979	2.15868
R-C-Sybr.002 T4 12	354	653	1744	915	332	0	n/a	20	676.857	6.76857e+09			948.429	9.48429e+09			1.62529e+10			41.6454			58.3546
R-C-Sybr.003 T4 12	404	918	1722	1071	308	0	n/a	20	833.774	8.33774e+09			972.737	9.72737e+09			1.80651e+10			46.1538			53.8462
R-A-PI.001 T6 12	599	0	n/a	0	n/a	765	23	20	0				0	0													468.621	4.68621e+09	6.02547e+09	9.78076e+08	0.102568	0.131881	0.0214073
R-A-PI.002 T6 12	782	0	n/a	0	n/a	1363	24.2	20	0				0	0													639.553	6.39553e+09			0.13998
R-A-PI.003 T6 12	416	0	n/a	0	n/a	793	23	20	0				0	0													699.467	6.99467e+09			0.153094
R-A-Sybr.001 T6 12	223	1100	1729	1202	342	0	n/a	20	1809.99	1.80999e+10	2.25488e+10	4.43578e+09	1977.82	1.97782e+10	2.314e+10	2.37718e+09	3.78781e+10	4.56888e+10	6.34322e+09	47.7845	49.0293	3.30183	52.2155	50.9707	3.30183
R-A-Sybr.002 T6 12	210	1637	1561	1420	286	0	n/a	20	2860.33	2.86033e+10			2481.17	2.48117e+10			5.3415e+10			53.5492			46.4508
R-A-Sybr.003 T6 12	236	1347	1249	1597	224	0	n/a	20	2094.32	2.09432e+10			2483.02	2.48302e+10			4.57734e+10			45.7541			54.2459
R-C-PI.001 T6 12	1618	0	n/a	0	n/a	254	24.9	20	0				0	0													57.6026	5.76026e+08	1.03381e+09	6.49664e+08	0.0507166	0.0910228	0.0572
R-C-PI.002 T6 12	778	0	n/a	0	n/a	414	26.5	20	0				0	0													195.258	1.95258e+09			0.171916
R-C-PI.003 T6 12	1864	0	n/a	0	n/a	291	24.6	20	0				0	0													57.2841	5.72841e+08			0.0504361
R-C-Sybr.001 T6 12	541	336	1454	512	281	0	n/a	20	227.892	2.27892e+09	4.36012e+09	1.72542e+09	347.264	3.47264e+09	6.99763e+09	2.93592e+09	5.75156e+09	1.13578e+10	4.66131e+09	39.6226	38.6773	0.71537	60.3774	61.3227	0.71537
R-C-Sybr.002 T6 12	368	431	997	688	180	0	n/a	20	429.751	4.29751e+09			686.006	6.86006e+09			1.11576e+10			38.5165			61.4835
R-C-Sybr.003 T6 12	211	374	1361	613	255	0	n/a	20	650.394	6.50394e+09			1066.02	1.06602e+10			1.71641e+10			37.8926			62.1074
		beads | Count	bacteria | Count	HNA | Count	LNA | Count	PI | Count	total volume	vol beads	PI/ul	PI/ml	average/ml	stdev	HNA/ul	HNA/ml	average/ml	stdev	LNA/ul	LNA/ml	average	stdev	total cells	average	stdev	FSC/SSC	FSC/ml	average	stdev	%HNA	average	stdev	%LNA	average	stdev	PI%	average	stdev	PI% my way	average	stdev	%total	Sybr cells vs FSC cells		PI FSC vs Sybr
T0 PI	T0-Pi.002	143	17396			4741	1000	20	2384.26	2.38426e+10	2.64064e+10	2.96221e+09												8748.47	8.74847e+10	1.03295e+11	1.20644e+10							#DIV/0!	#DIV/0!	#DIV/0!	0.272534	0.256396	0.0158078				0.268565
	T0-Pi.003	125	18363			4314	1000	20	2481.93	2.48193e+10														10564.6	1.05646e+11									#DIV/0!			0.234929						0.481578
	T0-Pi.004	114	18508			4844	1000	20	3055.75	3.05575e+10														11675.4	1.16754e+11									#DIV/0!			0.261725						0.725714
T Sybr	T0-Sybr.001	112	73074	24073	52025		1500	20					10304.8	1.03048e+11	7.84534e+10	2.09577e+10	22270.1	2.22701e+11	1.56882e+11	4.81094e+10	3.25749e+11	2.35335e+11	6.82461e+10	31280.4	3.12804e+11	2.32911e+11	6.28311e+10	0.316342	0.335126	0.022565	0.683658	0.664874	0.022565							1	1.04138
	T0-Sybr.002	116	73117	25963	44808		2000	20					8047.96	8.04796e+10			13889.5	1.38895e+11			2.19375e+11			22664.7	2.26647e+11			0.366859			0.633141									1	0.967914
	T0-Sybr.003	125	41529	13514	28432		1500	20					5183.24	5.18324e+10			10905	1.0905e+11			1.60882e+11			15928.3	1.59283e+11			0.322176			0.677824									1	1.01004
T2 PI C	T2-PI-C.001	175	22912			6139	500	20	5045.55	1.00911e+11														18831	3.7662e+11	3.95078e+11	4.51446e+10							#DIV/0!	#DIV/0!	#DIV/0!	0.267938	0.240798	0.0214726	0			0.661154
	T2-PI-C.002	142	22571			5395	500	20	5464.52	1.0929e+11														22861.8	4.57237e+11									#DIV/0!			0.239024			0			0.823409
	T2-PI-C.003	146	17834			3842	500	20	3784.89	7.56978e+10														17568.9	3.51378e+11									#DIV/0!			0.215431			0			0.868163
T2 PI G	T2-PI-G.001	153	20408			3786	500	20	3559.08	7.11816e+10														19184.8	3.83697e+11	3.03553e+11	7.90821e+10							#DIV/0!	#DIV/0!	#DIV/0!	0.185515	0.215261	0.0217521	0			0.576711
	T2-PI-G.002	299	20365			4825	500	20	2321	4.642e+10														9796.3	1.95926e+11									#DIV/0!			0.236926			0			0.348972
	T2-PI-G.003	151	17377			3881	500	20	3696.71	7.39342e+10														16551.9	3.31037e+11									#DIV/0!			0.223341			0			0.488575
T2 S C	T2-Sybr-C.001	128	38568	7260	30761		1500	40					5438.56	1.08771e+11	1.21053e+11	1.99316e+10	23043.5	4.6087e+11	3.88839e+11	6.69977e+10	5.69641e+11	5.09892e+11	7.45856e+10	28891.8	5.77836e+11	5.04423e+11	7.09194e+10	0.190947	0.239849	0.0347585	0.809053	0.760151	0.0347585							1	0.985817
	T2-Sybr-C.002	92	50554	14312	38967		1500	20					7458.3	1.49166e+11			20306.6	4.06132e+11			5.55298e+11			26344.8	5.26896e+11			0.268624			0.731376									1	1.0539
	T2-Sybr-C.003	159	67744	17448	49666		1500	20					5261.09	1.05222e+11			14975.8	2.99516e+11			4.04738e+11			20426.8	4.08537e+11			0.259976			0.740024									1	0.9907
T2 S G	T2-Sybr-G.001	93	64590	15034	49495		1500	20					7750.31	1.55006e+11	1.50732e+11	8.50846e+09	25515.6	5.10312e+11	4.84038e+11	4.36076e+10	6.65318e+11	6.34771e+11	5.2095e+10	33297.4	6.65947e+11	6.47477e+11	3.24752e+10	0.232981	0.237996	0.00659908	0.767019	0.762004	0.00659908							1	0.999056
	T2-Sybr-G.002	90	56488	13033	39664		1500	20					6942.72	1.38854e+11			21129.1	4.22583e+11			5.61437e+11			30091.3	6.01826e+11			0.24732			0.75268									1	0.932888
	T2-Sybr-G.003	85	59806	14036	46027		1500	20					7916.84	1.58337e+11			25961	5.1922e+11			6.77557e+11			33732.9	6.74658e+11			0.233688			0.766312									1	1.0043
T4 PI C	T4-PI-C.001	118	24442			6657	500	20	8114.19	1.62284e+11														29792.3	5.95845e+11	4.16208e+11	1.31523e+11							#DIV/0!	#DIV/0!	#DIV/0!	0.272359	0.311068	0.0288414	0			0.362964
	T4-PI-C.002	154	15237			4865	500	20	4543.71	9.08743e+10														14230.7	2.84615e+11									#DIV/0!			0.319289			0			0.18618
	T4-PI-C.003	140	17918			6120	500	20	6287.42	1.25748e+11														18408.2	3.68163e+11									#DIV/0!			0.341556			0			0.285712
T4 PI G	T4-PI-G.001	161	22049			5706	500	20	5097.47	1.01949e+11														19697.5	3.93951e+11	3.28814e+11	7.48683e+10							#DIV/0!	#DIV/0!	#DIV/0!	0.258787	0.23252	0.0270534	0			0.279897
	T4-PI-G.002	148	18961			3703	500	20	3598.66	7.19732e+10														18426.7	3.68535e+11									#DIV/0!			0.195296			0			0.456381
	T4-PI-G.003	158	12301			2995	500	20	2726.39	5.45279e+10														11197.8	2.23956e+11									#DIV/0!			0.243476			0			0.254011
T S C	T4-Sybr-C.001	118	33333	6207	27463		500	20					7565.69	3.02628e+11	3.0719e+11	3.22799e+10	33474.6	1.33898e+12	1.17911e+12	1.30859e+11	1.64161e+12	1.4863e+12	1.47209e+11	40629.5	1.62518e+12	1.54587e+12	1.32709e+11	0.184348	0.207386	0.0179617	0.815652	0.792614	0.0179617							1	1.01011
	T4-Sybr-C.002	105	30178	6366	21534		500	20					8720.19	3.48808e+11			29497.4	1.1799e+12			1.52871e+12			41338.1	1.65352e+12			0.228172			0.771828									1	0.924515
	T4-Sybr-C.003	130	30706	6104	23013		500	20					6753.36	2.70134e+11			25461.2	1.01845e+12			1.28858e+12			33972.6	1.3589e+12			0.209637			0.790363									1	0.948251
T4 S G	T4-Sybr-G.001	104	27597	5900	19543		500	20					8159.57	3.26383e+11	2.37258e+11	6.38793e+10	27027.6	1.0811e+12	7.94968e+11	2.03298e+11	1.40749e+12	1.03223e+12	2.6707e+11	38166.1	1.52664e+12	1.08469e+12	3.13221e+11	0.231891	0.229247	0.00458451	0.768109	0.770753	0.00458451							1	0.921948
	T4-Sybr-G.002	114	17628	3565	12436		500	20					4497.84	1.79913e+11			15690.1	6.27603e+11			8.07516e+11			22240.6	8.89625e+11			0.222799			0.777201									1	0.907704
	T4-Sybr-G.003	144	20970	5143	16925		500	20					5136.92	2.05477e+11			16905	6.762e+11			8.81677e+11			20945.2	8.37809e+11			0.233052			0.766948									1	1.05236
T6 PI C	T6-PI-C.001	135	19577			3436	500	20	3660.73	7.32147e+10														20857.4	4.17149e+11	4.35375e+11	2.15548e+10							#DIV/0!	#DIV/0!	#DIV/0!	0.175512	0.216991	0.0514592	0			0.303654
	T6-PI-C.002	129	18984			3530	500	20	3935.81	7.87161e+10														21166.4	4.23328e+11									#DIV/0!			0.185946			0			0.317226
	T6-PI-C.003	104	16835			4874	500	20	6740.64	1.34813e+11														23282.4	4.65649e+11									#DIV/0!			0.289516			0			0.409883
T6 PI G	T6-PI-G.001	116	11684			2852	500	20	3536.23	7.07246e+10														14487.1	2.89743e+11	3.32998e+11	3.11749e+10							#DIV/0!	#DIV/0!	#DIV/0!	0.244094	0.219023	0.0239994	0			0.157011
	T6-PI-G.002	144	18122			4101	500	20	4096.15	8.1923e+10														18100.6	3.62012e+11									#DIV/0!			0.2263			0			0.383382
	T6-PI-G.003	118	14244			2659	500	20	3241.05	6.48209e+10														17362	3.47239e+11									#DIV/0!			0.186675			0			0.29287
T6 S C	T6-Sybr-C.001	120	26758	5585	23069		500	20					6694.08	2.67763e+11	2.56268e+11	9.18929e+09	27650.1	1.106e+12	1.02516e+12	1.02674e+11	1.37377e+12	1.28143e+12	1.0404e+11	32071.6	1.28287e+12	1.26352e+12	8.25692e+10	0.194912	0.201283	0.0174695	0.805088	0.798717	0.0174695							1	1.07086
	T6-Sybr-C.002	106	24939	4519	20068		500	20					6131.76	2.4527e+11			27230	1.0892e+12			1.33447e+12			33839.3	1.35357e+12			0.183796			0.816204									1	0.985886
	T6-Sybr-C.003	129	25878	5735	19738		500	20					6394.29	2.55772e+11			22007.1	8.80283e+11			1.13605e+12			28852.9	1.15412e+12			0.22514			0.77486									1	0.98435
T6 S G	T6-Sybr-G.001	122	36690	9240	29892		500	20					10893.3	4.35734e+11	3.35536e+11	8.69815e+10	35240.7	1.40963e+12	9.89551e+11	3.00905e+11	1.84536e+12	1.32509e+12	3.80858e+11	43255	1.7302e+12	1.28409e+12	3.49109e+11	0.236124	0.255277	0.0265814	0.763876	0.744723	0.0265814							1	1.06656
	T6-Sybr-G.002	133	20294	5170	16659		500	20					5590.98	2.23639e+11			18015.5	7.2062e+11			9.44259e+11			21946.5	8.77859e+11			0.236841			0.763159									1	1.07564
	T6-Sybr-G.003	107	23140	6458	15593		500	20					8680.87	3.47235e+11			20960.2	8.38407e+11			1.18564e+12			31104.9	1.24419e+12			0.292867			0.707133									1	0.952939
G= gas pack
C= chamber										T0	T2A	T2C	T4A	T4C	T6A	T6C
									PI	#DIV/0!	#DIV/0!	#DIV/0!	#DIV/0!	#DIV/0!	#DIV/0!	#DIV/0!
									HNA	0.335126	0.237996	0.239849	0.229247	0.207386	0.255277	0.201283

## Sheet: Beads concentration
Raw data for the concentration of reference beads
Sample date	Beads count	Countbright counts	vol beads (uL)	vol Countbright (uL)	vol sample (uL)	beads/ul
2016-05-04	532	91	10	10	1020	6080
2016-05-05	785	128	20	20	1040	6378.12
2016-05-09	579	156	20	20	1040	3860
2016-05-11	1284	159	20	20	1040	8398.49
2016-05-12	1720	195	20	20	1040	9173.33
2016-05-10	1258	184	20	20	1040	7110.43
