# Supplementary material for: Effects of oxygen exposure on relative nucleic acid content and membrane integrity in the human gut microbiota
Source: PeerJ journal article supplement (doi:10.7717/peerj.10602), 2021-02-03
Supplement: Supplemental_Figure_1.pdf [file Supplemental_Figure_1.pdf]

1 **Supplemental Figure 1: Median SSC values between HNA and LNA cells.** Left: Acquired on  
2 the Calibur (N=28); Right: Acquired on the Canto (N= 33). Statistical significance was assessed  
3 as a paired t-test, error bars represent SD. \*\*\* P<0.0001

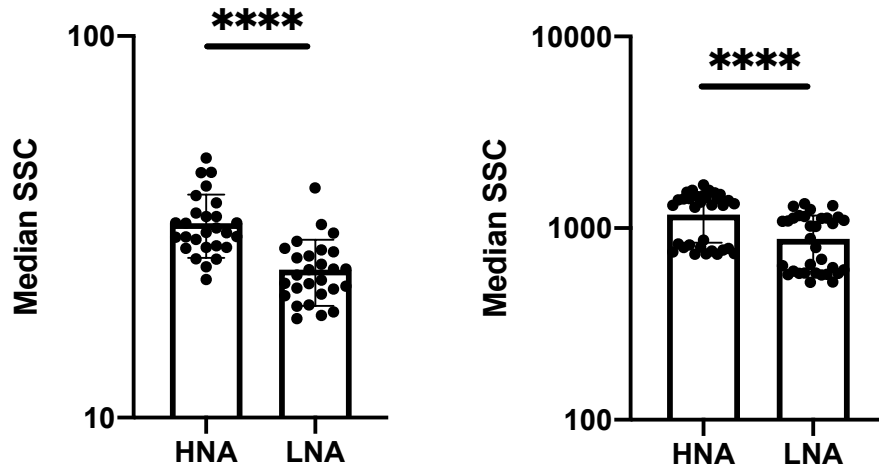

4

5
