# Supplementary material for: Effects of oxygen exposure on relative nucleic acid content and membrane integrity in the human gut microbiota
Source: PeerJ journal article supplement (doi:10.7717/peerj.10602), 2021-02-03

**Supplemental Figure 2: Absolute cell abundances in each oxygen exposure condition.**

Statistical significance was assessed with repeated measures one way ANOVA with Dunnet's multiple comparisons test. Paired samples are connected by a line between oxygen exposure conditions (n=8). \* P<0.05

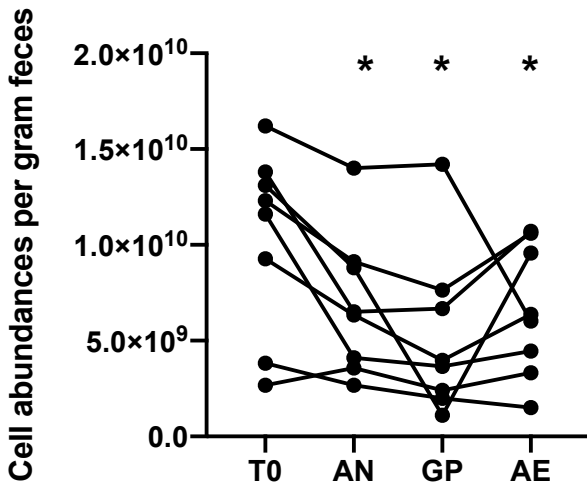

Supplement: Supplemental_Figure_2.pdf [file Supplemental_Figure_2.pdf]
