# Supplementary material for: Effects of oxygen exposure on relative nucleic acid content and membrane integrity in the human gut microbiota
Source: PeerJ journal article supplement (doi:10.7717/peerj.10602), 2021-02-03
Supplement: Supplemental_Figure_3.pdf [file Supplemental_Figure_3.pdf]

1 **Supplemental Figure 3: The diversity of the initial community does not reflect the proportion**  
2 **of HNA or PI<sup>+</sup> bacteria after oxygen exposure for 6 hours.** Spearman correlation between the  
3 weighted UniFrac distances of the initial population to the proportion of HNA (left) or PI<sup>+</sup> (right)  
4 bacteria after oxygen exposure (N = 10 individuals, 3 oxygen exposure conditions each, pairwise  
5 comparisons).

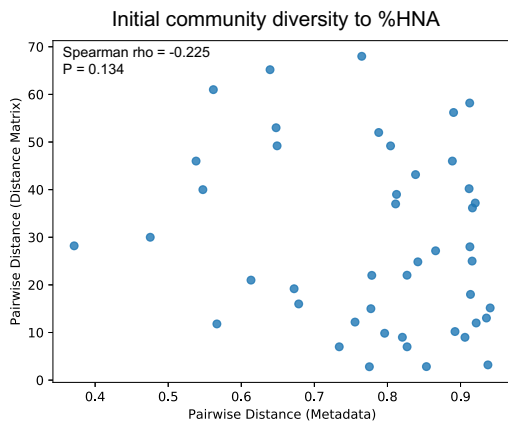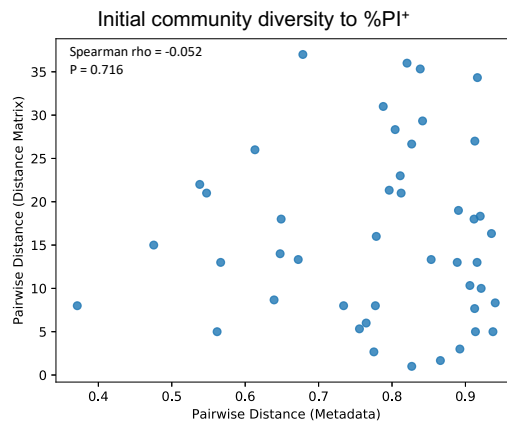

6  
7  
8  
9
